# Supplementary material for: The increased risks of death and extra lengths of hospital and ICU stay from hospital-acquired bloodstream infections: a case–control study
Source: PubMed Central journal article supplement — BMJ Open. 2013 Oct 31;3(10):e003587. doi: 10.1136/bmjopen-2013-003587 (PMC3816236; doi:10.1136/bmjopen-2013-003587), 2013-10-31
Supplement: bmjopen-2013-003587.draft_revisions.pdf [file bmjopen-2013-003587.draft_revisions.pdf]

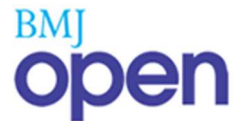

**The increased risks of death and extra lengths of hospital  
and ICU stay from hospital-acquired bloodstream infections:  
a case-control study**

|                                 |                                                                                                                                                                                                                                                                                                                                                                                                                                                                                                                                                                                                                                                                                                                                                                                                                                                                                                                                                                                                                                                                        |
|---------------------------------|------------------------------------------------------------------------------------------------------------------------------------------------------------------------------------------------------------------------------------------------------------------------------------------------------------------------------------------------------------------------------------------------------------------------------------------------------------------------------------------------------------------------------------------------------------------------------------------------------------------------------------------------------------------------------------------------------------------------------------------------------------------------------------------------------------------------------------------------------------------------------------------------------------------------------------------------------------------------------------------------------------------------------------------------------------------------|
| Journal:                        | <i>BMJ Open</i>                                                                                                                                                                                                                                                                                                                                                                                                                                                                                                                                                                                                                                                                                                                                                                                                                                                                                                                                                                                                                                                        |
| Manuscript ID:                  | bmjopen-2013-003587                                                                                                                                                                                                                                                                                                                                                                                                                                                                                                                                                                                                                                                                                                                                                                                                                                                                                                                                                                                                                                                    |
| Article Type:                   | Research                                                                                                                                                                                                                                                                                                                                                                                                                                                                                                                                                                                                                                                                                                                                                                                                                                                                                                                                                                                                                                                               |
| Date Submitted by the Author:   | 12-Jul-2013                                                                                                                                                                                                                                                                                                                                                                                                                                                                                                                                                                                                                                                                                                                                                                                                                                                                                                                                                                                                                                                            |
| Complete List of Authors:       | Barnett, Adrian; Queensland University of Technology, Institute of Health and Biomedical Innovation<br>Page, Katie; Queensland University of Technology, Institute of Health and Biomedical Innovation<br>Campbell, Megan; Queensland University of Technology, Institute of Health and Biomedical Innovation<br>Martin, Elizabeth; Queensland University of Technology, Institute of Health and Biomedical Innovation<br>Rashleigh-Rolls, Rebecca; Royal Brisbane and Women's Hospital,<br>Halton, Kate; Queensland University of Technology, Institute of Health and Biomedical Innovation<br>Paterson, David; The University of Queensland Centre for Clinical Research,<br>Hall, Lisa; Queensland University of Technology, Institute of Health and Biomedical Innovation<br>Jimmieson, Nerina; The University of Queensland, School of Psychology<br>White, Katherine; Queensland University of Technology, Institute of Health and Biomedical Innovation<br>Graves, Nicholas; Queensland University of Technology, Institute of Health and Biomedical Innovation |
| <b>Primary Subject Heading</b>: | Infectious diseases                                                                                                                                                                                                                                                                                                                                                                                                                                                                                                                                                                                                                                                                                                                                                                                                                                                                                                                                                                                                                                                    |
| Secondary Subject Heading:      | Intensive care                                                                                                                                                                                                                                                                                                                                                                                                                                                                                                                                                                                                                                                                                                                                                                                                                                                                                                                                                                                                                                                         |
| Keywords:                       | INFECTIOUS DISEASES, GENERAL MEDICINE (see Internal Medicine), Health & safety < HEALTH SERVICES ADMINISTRATION & MANAGEMENT, INTENSIVE & CRITICAL CARE                                                                                                                                                                                                                                                                                                                                                                                                                                                                                                                                                                                                                                                                                                                                                                                                                                                                                                                |
|                                 |                                                                                                                                                                                                                                                                                                                                                                                                                                                                                                                                                                                                                                                                                                                                                                                                                                                                                                                                                                                                                                                                        |

SCHOLARONE™  
Manuscripts

1  
2  
3 **The increased risks of death and extra lengths of hospital and ICU stay from hospital-**  
4 **acquired bloodstream infections: a case-control study**  
5  
6  
7

8 Adrian G Barnett<sup>1</sup>, Katie Page<sup>1</sup>, Megan Campbell<sup>1</sup>, Elizabeth Martin<sup>1</sup>, Rebecca Rashleigh-  
9 Rolls<sup>1,2</sup>, Kate Halton<sup>1</sup>, David L Paterson<sup>3,4</sup>, Lisa Hall<sup>1,4</sup>, Nerina Jimmieson<sup>5</sup>,  
10  
11 Katherine White<sup>1</sup>, Nicholas Graves<sup>1,4</sup>  
12  
13

14  
15  
16 1 Institute of Health and Biomedical Innovation, Queensland University of Technology,  
17  
18 Queensland, Australia  
19

20 2 Royal Brisbane and Women's Hospital, Queensland, Australia  
21

22 3 The University of Queensland Centre for Clinical Research, Queensland, Australia  
23

24  
25 4 Centre for Healthcare Related Infection Surveillance and Prevention, Queensland Health,  
26  
27 Queensland, Australia  
28

29  
30 5 School of Psychology, The University of Queensland, St Lucia, Queensland, Australia  
31  
32

33  
34  
35 Corresponding address: Adrian G Barnett, Institute of Health and Biomedical Innovation,  
36  
37 Queensland University of Technology, 60 Musk Avenue, Kelvin Grove, Queensland 4059,  
38  
39 Australia. Phone: +61 7 3138 6010. Fax: +61 7 3138 6030. E-mail: [a.barnett@qut.edu.au](mailto:a.barnett@qut.edu.au).  
40  
41  
42

43  
44 Word count: 2,793  
45  
46  
47  
48  
49  
50  
51  
52  
53  
54  
55  
56  
57  
58  
59  
60

## Structured abstract

Objectives: Hospital-acquired bloodstream infections are known to increase the risk of death and prolong hospital stay, but precise estimates of these two important outcomes from well designed studies are rare, particularly for non-ICU patients. We aimed to calculate accurate estimates, which are vital for estimating the economic costs of hospital-acquired bloodstream infections.

Design: Case-control study.

Setting: Nine Australian public hospitals.

Participants: All admitted patients between 2005 and 2010.

Primary and secondary outcome measures: Risk of death and extra length of hospital stay associated with nosocomial infection.

Results: The greatest increase in the risk of death was for a bloodstream infection with Methicillin-resistant *Staphylococcus aureus* (hazard ratio = 4.6, 95% CI: 2.7, 7.6). This infection also had the longest extra length of stay to discharge in a standard bed (12.8 days, 95% CI: 6.2, 26.1 days). All eight bloodstream infections increased the length of stay in the ICU, with longer stays for patients who eventually died (mean increase: 0.7 to 6.0 days) compared with those who were discharged (mean increase: 0.4 to 3.1 days).

Conclusions: Bloodstream infections are associated with an increased risk of death and longer hospital stay. Avoiding infections could save lives and free up valuable bed days.

## Article summary

### Article focus

- There are few accurate estimates of the increased risk of death and extra length of hospital stay after a hospital-acquired infection because of the frequent use of study designs that ignore the time-dependent bias.
- We used a multi-state approach to overcome the time-dependent bias.

### Key messages

- All eight of the bloodstream infections studied were associated with an increased risk of death and longer hospital stay.

### Strengths and limitations of this study

- We had an extremely large sample size, but with little detailed individual information. We could not therefore match or control for detailed individual characteristics, which may mean there is some residual confounding in our estimates.
- Our estimates will be useful for economic studies on the costs and health benefits of interventions that reduce hospital-acquired infections.

## INTRODUCTION

Hospital-acquired infections increase a patient's risk of death and prolong their hospital stay.<sup>1</sup> Accurate estimates of the increased risk of death and extra length of stay are rare because of the complex statistical analysis needed to avoid the potentially serious biases of ignoring the timing of infection.<sup>2,3</sup> There are few accurate estimates of the extra length of stay and increased risk of death due to bloodstream infections,<sup>4</sup> with most good estimates only for patients in intensive care. This is an important gap in our understanding of the complete burden of hospital-acquired bloodstream infections, particularly as death and length of stay are vital for estimating the economic costs of hospital-acquired infections.<sup>5-7</sup> Also, financial penalties are applied in some hospitals for any hospital-acquired bloodstream infection (not just central line associated bloodstream infection).

In this paper we used an analysis that accounts for the timing of infection and hence gives accurate estimates of the risk of death and extra length of stay. We examined eight types of hospital-acquired bloodstream infections using data from nine Australian hospitals over six years. We estimated the extra length of stay due to infections for both standard and intensive care unit (ICU) beds.

## METHODS

### Data

We examined the nine largest public hospitals in Queensland, Australia (see Table 1 for some descriptive statistics). We requested all patient admissions with an admission or discharge date between 1 January 2005 and 31 December 2010 from the Health Statistics Centre of Queensland Health. The infection data came from the Centre for Healthcare Related Infection Surveillance and Prevention (CHRISP), Queensland Health. The admission and infection data

1  
2  
3 were linked by Queensland Health staff using a unique patient unit record number and  
4  
5 infection date.  
6  
7

8 The data used included the dates of admission, discharge and infection (if any), and the dates  
9  
10 (if any) of admissions and discharges from intensive care. Data were also requested on  
11  
12 admitting hospital, patient age, principal diagnosis code (ICD-10) and outcome in three  
13  
14 categories: discharged alive, died or censored. Censored meant the outcome of the patient  
15  
16 was unknown, which occurred when: i) the patient was transferred to another hospital, ii) the  
17  
18 patient was discharged to some other facility, such as an aged care facility or medi-hotel. We  
19  
20 accounted for this censoring in our analyses using statistical censoring.  
21  
22  
23

24 CHRISP coordinates a statewide healthcare associated infection surveillance program, which  
25  
26 aggregates and assures data quality. The surveillance definitions and processes have been  
27  
28 refined and validated over ten years,<sup>8</sup> and are consistent with national and international  
29  
30 definitions. Hospitals monitor infections hospital-wide as detailed in the surveillance  
31  
32 manual.<sup>9</sup> The data undergo a central quality assurance check every six months, and the  
33  
34 observed numbers of infections are regularly compared with expected numbers. Hospitals  
35  
36 with numbers that are lower than the state-wide control limit are asked about their  
37  
38 surveillance processes.  
39  
40  
41  
42

43 Bloodstream infections were classified *a priori* into four non-mutually exclusive groups,  
44  
45 those due to: (1) *Staphylococcus aureus*, (2) coagulase negative staphylococci, (3) Gram  
46  
47 positive organisms and (4) Gram negative organisms. After examining the results from these  
48  
49 four groups we added four further subgroups, viz. *Staphylococcus aureus* infections were  
50  
51 split into Methicillin-resistant *Staphylococcus aureus* (MRSA) and Methicillin-sensitive  
52  
53 *Staphylococcus aureus* (MSSA), and Gram negative organisms were split into *E. coli* and  
54  
55 *Pseudomonas aeruginosa*, to examine a lower and higher virulence organism, respectively.  
56  
57  
58  
59  
60

1  
2  
3 The infection groups are not mutually exclusive, for example, bloodstream infections due to  
4  
5 *Staphylococcus aureus* were also classified in the Gram positive organism group.  
6  
7

8 Community associated infections were excluded. The portal of entry of bloodstream infection  
9  
10 (e.g., urinary tract infection, pneumonia, intra-abdominal infection, central line) was not  
11  
12 available.  
13

14  
15 The study was approved by the ethics committees of Queensland Health and Queensland  
16  
17 University of Technology. The Research Ethics Governance Unit for Queensland Health  
18  
19 approved the data collection and linkage process, number: HREC/10/QPAH/180.  
20  
21

## 22 23 **Statistical methods**

24  
25 The basis of our statistical model is shown in Figure 1. A patient's admission over time is  
26  
27 modelled using the four states, with all patients eventually dying or being discharged, and  
28  
29 some patients being infected. Using this multi-state model we can examine our two key  
30  
31 questions:  
32  
33

- 34  
35 1. By how much did a hospital-acquired bloodstream infection increase the risk of death?
  - 36  
37 2. By how much did a hospital-acquired bloodstream infection increase the length of stay?
- 38  
39  
40

### 41 *Incidence density sampling*

42  
43 We created a smaller group of infected and non-infected patients from the complete data  
44  
45 using incidence density sampling.<sup>10</sup> The incidence density sampling approach is illustrated in  
46  
47 Figure 2. Patient E is the infected case, whose infection occurred four days after their  
48  
49 admission. Patient D is not a potential control, as they were discharged alive before day four.  
50  
51 The other three patients (A to C) are all eligible controls as they were infection free at the  
52  
53 time of the case's infection. This includes patient C, who acquired an infection on a later day.  
54  
55  
56  
57  
58  
59  
60

1  
2  
3 The days in hospital after the infection (for both cases and controls) were used to estimate the  
4  
5 extra length of stay (solid lines in Figure 2). We examined the extra number of days in both  
6  
7 standard and intensive care beds (thin and thick lines in Figure 2, respectively). For patients  
8  
9 with multiple infections, we only considered their first infection. This was done to simplify  
10  
11 the analysis (as multiple infections would require another state in Figure 1), and because  
12  
13 there were relatively few admissions with multiple infections.  
14  
15

16  
17 Matching infected patients to control patients when estimating the extra length of stay due to  
18  
19 infection usually gives poor estimates because of the time-dependent bias.<sup>5</sup> This bias occurs  
20  
21 because the time before infection is used when estimating the extra length of stay (dashed  
22  
23 horizontal lines in Figure 2). However, unlike traditional matching studies, we used incidence  
24  
25 density sampling, which also matches on the timing of infection because potential controls  
26  
27 must have been infection free at the time of the case's infection.<sup>10</sup>  
28  
29

30  
31 To make comparable groups of patients in terms of morbidity we matched infected cases to  
32  
33 controls who: had the same first letter in the principal diagnosis code (using ICD-10 coding),  
34  
35 were of a similar age (within 10 years), were at the same hospital, and were infection free at  
36  
37 the time of the case's infection. We randomly selected four controls for each infected patient.  
38  
39

#### 40 41 *Statistical power*

42  
43 The study had a 90% power to detect an increased hazard ratio of 1.40 (40%) for infected  
44  
45 versus uninfected patients using the smallest number of infections of 189 for MRSA, and an  
46  
47 increased hazard ratios of 1.18 (18%) for the second smallest number of infections of 744.  
48  
49

50  
51 These calculations assumed a two-sided 5% significance level.  
52

53  
54 We only examined the risk of in-hospital death, as we had no information on patients after  
55  
56 discharge.  
57



### *Extra length of stay*

We estimated the extra length of stay due to infection using the following steps. We calculated the number of days from infection to discharge for cases, and the number of days from the case's infection to discharge for its four matched controls. We then subtracted the case's length of stay from the average length of stay for its matched controls, with separate estimates for stays in standard and ICU beds. We then averaged these individual extra lengths of stay over all cases. These averages were stratified to create separate estimates for patients discharged alive and dead.

There are no parametric equations for calculating confidence intervals for the extra length of stay, hence we used a bootstrap method to generate a 95% confidence interval.<sup>11</sup> We randomly selected sets of cases and matched controls with replacement, creating a random sample with the same sample size as the original data. We repeated this random selection 1,000 times.

All analyses were conducted in R version 2.15.0 using the "survival" library.

## **RESULTS**

### *Hazard ratios*

The hazard ratios (HRs) for the eight bloodstream infections are in Table 2. All eight infections increased the risk of death, with the largest risk for MRSA (HR = 4.6) and the smallest for gram negative BSI (HR = 2.1). The increases were statistically significant for all eight infections, as the lower limits of the 95% confidence intervals were all above 1. The greatest number of infections was 2,141 for gram positive BSI, and the smallest number was 189 for MRSA.

### *Extra length of stay*

1  
2  
3 The extra lengths of stay for the eight bloodstream infections are in Table 3. For patients that  
4 died, there was no extra length of stay in a standard bed (as all the 95% confidence intervals  
5 include zero). For patients discharged alive, infection was associated with an extra length of  
6 stay in a standard bed for every type of bloodstream infection except the gram negative BSIs.  
7  
8 The longest extra length of stay to discharge in a standard bed was 12.8 days for MRSA  
9  
10 (95% CI: 6.2, 26.1 days). The 95% confidence intervals are noticeably wider for infections  
11  
12 with smaller numbers.  
13  
14  
15  
16  
17

18  
19 Most of the bloodstream infection types were associated with an extra length of stay in ICU  
20  
21 for both patients that lived and died (Table 3). The extra lengths of stay were generally longer  
22  
23 for those patients that died. The longest extra length of stay to death in an ICU bed was 6.0  
24  
25 days for a BSI with CNS (95% CI: 3.3, 10.0 days).  
26  
27

## 28 29 **CONCLUSION**

30  
31  
32 This is one of the largest studies to estimate the increased length of stay and risk of death due  
33  
34 to hospital-acquired infection.<sup>4</sup> All eight bloodstream infection types studied increased the  
35  
36 risk of death and most led to extra days in intensive care. Five of the bloodstream infections  
37  
38 also prolonged stay in a standard hospital bed by an average of between 9.8 and 12.8 days.  
39  
40 The eight hospital-acquired infections studied therefore significantly increased mortality and  
41  
42 morbidity.  
43  
44

45  
46 Gram negative infections had generally shorter extra lengths of stay and lower risks of death  
47  
48 compared with the other infection types. The three most common organisms of gram negative  
49  
50 infection were *E. Coli*, *Pseudomonas aeruginosa* and *Klebsiella pneumoniae*. There were no  
51  
52 clear differences between patients with a gram positive and gram negative infection in terms  
53  
54 of their age or primary diagnosis (data not shown). BSI with CNS had a higher death risk  
55  
56  
57  
58  
59  
60

1  
2  
3 (HR=2.9) than Gram-negative BSIs (HR=2.1), which could reflect the higher risk of organ  
4  
5 failure.<sup>12</sup>  
6  
7

8 The average extra lengths of stay after infection were shorter for ICU bed days compared  
9  
10 with ward bed days for all infections. This is expected as the average extra length of stay is  
11  
12 proportional to the average total length of stay,<sup>2</sup> and lengths of stay were generally longer in  
13  
14 ward beds compared with ICU beds.  
15

16  
17  
18 MRSA was associated with the largest increased risk of death (HR = 4.6) and the largest  
19  
20 increase in length of stay for a standard bed (12.8 days for those discharged alive). BSI with  
21  
22 CNS had the largest increased length of stay in an ICU bed of 6.0 days for patients who died  
23  
24 and 1.4 days for patients discharged alive. These estimates of hazard ratio and length of stay  
25  
26 are similar to those from related studies that account for the time-dependent bias. A study in  
27  
28 European hospitals found hazard ratios of 3.5 due to MRSA BSI and 3.1 for MSSA BSI, with  
29  
30 an extra length of stay of 9.2 days for MRSA BSI and 8.6 days for MSSA BSI.<sup>13</sup> Results  
31  
32 from ICUs in 10 European countries gave estimated hazard ratios for BSIs ranging from 2.1  
33  
34 to 4.4 depending on the organism, and extra lengths of stay in ICU ranging from -0.1 to 3.7  
35  
36 days.<sup>1</sup> ICUs in France had an estimated odds ratio for death of 3.2 due to a BSI infection,  
37  
38 with a lower odds ratio of 2.7 for those who received appropriate treatment.<sup>14</sup> ICUs in Latin  
39  
40 America had average excess length of stay due to a central-line association BSI between -1.2  
41  
42 and 4.7 days.<sup>15</sup> A study of ICUs in Germany found an extra length of stay of 2.7 days for  
43  
44 BSIs.<sup>3</sup>  
45  
46  
47  
48

### 49 ***Study limitations***

50  
51  
52 We used a large routinely collected data set of all hospital admissions. Larger data sets give  
53  
54 more statistical power, but are often not as detailed or error-free as prospectively collected  
55  
56  
57  
58  
59  
60

1  
2  
3 data. The hospital admission data used here are subject to data checking at the time of entry,  
4  
5 and we subjected the data to further logical checks and found no errors.  
6  
7

8 We matched controls to cases using the first letter of ICD-10 code so that controls and cases  
9  
10 were broadly similar in terms of morbidity, and to prevent very different patients being  
11  
12 compared (e.g., psychiatric patients with renal patients). We did not adjust for morbidity  
13  
14 beyond age and ICD-10 code because no further morbidity data were available. It is possible  
15  
16 that even after the matching, the infected cases were sicker than the controls (prior to the  
17  
18 infection) and that this somewhat explains the cases' extra length of stay and increased risk of  
19  
20 death. However, adjusting for the timing of infection (which we did) is far more important  
21  
22 than adjusting for baseline morbidity when estimating the extra length of stay due to  
23  
24 infection.<sup>16</sup>  
25  
26  
27

28  
29 Despite using hospital-wide surveillance, some infections may have been missed. The  
30  
31 surveillance relies on clinical testing, so an infected but untested patient would be missed.  
32  
33 However, collection of blood cultures is standard for patients with a fever during  
34  
35 hospitalisation.  
36  
37

38  
39 Our results should be generalisable to other settings, but it is possible that differences will  
40  
41 occur depending on how infections are managed. For example, some hospitals use hospital in  
42  
43 the home schemes, where infected patients can be cared for at home rather than in the  
44  
45 hospital.<sup>17</sup> Caring for infected patients in their own home would reduce the extra length of  
46  
47 hospital stay due to infection. Unfortunately we did not have data on the use of hospital in the  
48  
49 home, and so could not estimate the entire patient journey. If we had this data it could have  
50  
51 been added as another state to the multi-state model in Figure 1.  
52  
53

54  
55 We had no data on why the extra length of stay occurred. For example, the extra lengths of  
56  
57 stay may be directly due to the increased morbidity of infection or they could be due to a  
58  
59  
60

1  
2  
3 change in patient management, such as the use of defined durations of intravenous antibiotics  
4  
5 (such as for *Staphylococcus aureus* bloodstream infection). It is also possible that the total  
6  
7 extra length of stay after bloodstream infection is not solely due to the infection. For  
8  
9 example, a patient's stay is initially extended because of a bloodstream infection, then during  
10  
11 this extra stay an unrelated adverse event happens, for example an adverse drug reaction that  
12  
13 keeps them in hospital for longer.<sup>18</sup> To further investigate extra length of stay due to  
14  
15 infection, we recommend a detailed individual study that follows patients from the time of  
16  
17 their infection to discharge, and details the decisions made and resources used.<sup>19</sup> In some  
18  
19 hospitals this is already collected using a post-infection review.  
20  
21

### 22 23 ***Study strengths***

24  
25 This is one of the first studies to accurately estimate the extra length of stay due to  
26  
27 bloodstream infection in a standard hospital bed, as most previous good estimates only  
28  
29 examined ICU beds. This is important because days in hospital are costly so extra length of  
30  
31 stay is key to determining the economic costs of infection,<sup>20</sup> as well as being an important  
32  
33 measure of morbidity. ICU beds have a far greater economic cost than standard beds, so it is  
34  
35 vital to get separate estimates for ward and ICU beds.<sup>21</sup>  
36  
37

38  
39 Our results can be used to inform parameters for studies of the cost-effectiveness of  
40  
41 interventions that reduce risks of hospital-acquired infection. This is the most useful  
42  
43 application of estimates, as only describing the size of the cost does not help decision-makers,  
44  
45 although it might get the attention of politicians and the media in the short-term. Also,  
46  
47 erroneous estimates of these parameters might have misled decision making in the past.<sup>5</sup> The  
48  
49 application of a multi-state modelling approach (Figure 1), which appropriately classifies  
50  
51 patient risks over time should become the gold standard method for these studies.<sup>3</sup>  
52  
53  
54  
55  
56  
57  
58  
59  
60

1  
2  
3 A key parameter in cost-effectiveness models is the extra number of deaths, as the years of  
4  
5 life lost have a potentially large economic cost. We found that all eight types of bloodstream  
6  
7 infections increased the risk of death. Avoiding infections is therefore likely to both save  
8  
9 lives and free up valuable bed days.  
10

11  
12  
13 **What is already known on this subject?**

14  
15 Hospital-acquired bloodstream infections are thought to increase the risk of death and lead to  
16  
17 longer stays in hospital. The only previous estimates of the risks to date have been: biased by  
18  
19 poor statistical methods, or only applicable to patients in intensive care units.  
20

21  
22 **What this study adds?**

23  
24 This is the first study to accurately estimate the risks of death and extra length of stay in a  
25  
26 hospital population. These estimates will be vital for cost-effectiveness analyses of  
27  
28 interventions in hospital that aim to reduce infections (e.g., alternative cleaning regimes).  
29  
30

31 **Acknowledgements:** Thanks to all the hospital Infection Control Practitioners for  
32  
33 undertaking the HAI surveillance used for this analysis. Thanks also to the staff at  
34  
35 Queensland Health in the Health Statistics Centre and Centre for Healthcare Related Infection  
36  
37 Surveillance and Prevention, for providing and merging the hospital and infection data.  
38

39  
40 Computational resources and services used in this work were provided by the High  
41  
42 Performance Computer and Research Support Unit, Queensland University of Technology,  
43  
44 Brisbane, Australia.  
45  
46

47  
48 **Competing interests:** None.  
49

50  
51 **Funding:** This work was supported by a National Health and Medical Research Council  
52  
53 partnership grant (number 553081) with financial and in kind support from: Australian  
54  
55 Commission on Safety and Quality in Health Care, Hand Hygiene Australia, and  
56  
57  
58  
59  
60

1  
2  
3 jurisdictional health departments. The Centre for Healthcare Related Infection Surveillance  
4  
5 and Prevention, Communicable Diseases Branch, Queensland Health, supports the salaries of  
6  
7 N.G. and D.L.P. K.P.'s salary comes from the National Health and Medical Research Council  
8  
9 partnership grant.  
10

### 11 12 **Data Sharing**

13  
14  
15  
16 All the data used in this study are available from Queensland Health and the Centre for  
17  
18 Healthcare Related Infection Surveillance and Prevention subject to ethical approval. Please  
19  
20 contact Adrian Barnett (a.barnett@qut.edu.au) if you are interested in accessing the data.  
21  
22  
23  
24  
25  
26  
27  
28  
29  
30  
31  
32  
33  
34  
35  
36  
37  
38  
39  
40  
41  
42  
43  
44  
45  
46  
47  
48  
49  
50  
51  
52  
53  
54  
55  
56  
57  
58  
59  
60

## References

1. Lambert, M-L, Suetens, C, Savey, A, *et al.* Clinical outcomes of health-care-associated infections and antimicrobial resistance in patients admitted to European intensive-care units: a cohort study. *Lancet Infect Dis* 2011;**11**:30-38.
2. Barnett, AG, Beyersmann, J, Allignol, A, Rosenthal, VD, Graves, N, Wolkewitz, M. The Time-Dependent Bias and its Effect on Extra Length of Stay due to Nosocomial Infection. *Value in Health* 2011;**14**:381-386.
3. Beyersmann, J, Gastmeier, P, Grundmann, H, *et al.* Use of multistate models to assess prolongation of intensive care unit stay due to nosocomial infection. *Infect Control Hosp Epidemiol* 2006;**27**:493-499.
4. Crnich, C. Estimating excess length of stay due to central line-associated bloodstream infection: separating the wheat from the chaff. *Infect Control Hosp Epidemiol* 2010;**31**:1115–1117.
5. Graves, N, Harbarth, S, Beyersmann, J, Barnett, A, Halton, K, Cooper, B. Estimating the Cost of Health Care-Associated Infections: Mind Your p's and q's. *Clinical Infectious Diseases* 2010;**50**:1017-1021.
6. Halton, KA, Cook, D, Paterson, DL, Safdar, N, Graves, N. Cost-Effectiveness of a Central Venous Catheter Care Bundle. *PLoS ONE* 2010;**5**:e12815.
7. Graves, N, Halton, K, Doidge, S, Clements, A, Lairson, D, Whitby, M. Who bears the cost of healthcare-acquired surgical site infection? *Journal of Hospital Infection* 2008;**69**:274-282.
8. Morton, AP, Clements, AC, Doidge, SR, Stackelroth, J, Curtis, M, Whitby, M. Surveillance of Healthcare-Acquired Infections in Queensland, Australia: Data and Lessons From the First 5 Years. *Infect Control Hosp Epidemiol* 2008;**29**:695-701.



- 1  
2  
3 9. Centre for Healthcare Related Infection Surveillance and Prevention, *Surveillance*  
4 *Manual*. 2009, Queensland Health.  
5  
6  
7 10. Wolkewitz, M, Beyersmann, J, Gastmeier, P, Schumacher, M. Efficient Risk Set  
8 Sampling when a Time-dependent Exposure Is Present. *Methods Inf Med* 2009;**48**:438–  
9 443.  
10  
11  
12  
13 11. Davison, AC, Hinkley, DV, *Bootstrap Methods and Their Application*: Cambridge  
14 University Press; 1997.  
15  
16  
17 12. Savithri, MB, Iyer, V, Jones, M, *et al*. Epidemiology and significance of coagulase-  
18 negative staphylococci isolated in blood cultures from critically ill adult patients. *Crit*  
19 *Care Resusc* 2011;**13**:103-107.  
20  
21  
22  
23 13. de Kraker, MEA, Wolkewitz, M, Davey, PG, Grundmann, H. Clinical Impact of  
24 Antimicrobial Resistance in European Hospitals: Excess Mortality and Length of Hospital  
25 Stay Related to Methicillin-Resistant Staphylococcus aureus Bloodstream Infections.  
26 *Antimicrob Agents Chemother* 2011;**55**:1598-1605.  
27  
28  
29 14. Garrouste-Orgeas, M, Timsit, JF, Tafflet, M, *et al*. Excess Risk of Death from  
30 Intensive Care Unit—Acquired Nosocomial Bloodstream Infections: A Reappraisal.  
31 *Clinical Infectious Diseases* 2006;**42**:1118-1126.  
32  
33  
34 15. Barnett, AG, Graves, N, Rosenthal, VD, Salomao, R, Rangel-Frausto, MS. Excess  
35 Length of Stay Due to Central Line—Associated Bloodstream Infection in Intensive Care  
36 Units in Argentina, Brazil, and Mexico. *Infect Control Hosp Epidemiol* 2010;**31**:1106-  
37 1114.  
38  
39  
40  
41 16. Beyersmann, J, Kneib, T, Schumacher, M, Gastmeier, P. Nosocomial Infection,  
42 Length of Stay, and Time-Dependent Bias. *Infection Control and Hospital Epidemiology*  
43 2009;**30**:273-276.  
44  
45  
46  
47  
48  
49  
50  
51  
52  
53  
54  
55  
56  
57  
58  
59  
60

- 1  
2  
3 17. Howden, BP, Grayson, ML. Hospital-in-the-home treatment of infectious diseases.  
4  
5 *Med J Aust* 2002;**176** 440-445.  
6  
7 18. Hauck, K, Zhao, X. How Dangerous is a Day in Hospital?: A Model of Adverse  
8  
9 Events and Length of Stay for Medical Inpatients. *Med Care* 2011;**49**:1068-1075.  
10  
11 19. Collignon, PJ, Wilkinson, IJ, Gilbert, GL, Grayson, ML, Whitby, RM. Health care-  
12  
13 associated Staphylococcus aureus bloodstream infections: a clinical quality indicator for  
14  
15 all hospitals. *Med J Aust* 2006;**184**:404-406.  
16  
17 20. Grayson, ML, Russo, PL, Cruickshank, M, *et al*. Outcomes from the first 2 years of  
18  
19 the Australian National Hand Hygiene Initiative. *Med J Aust* . 2011;**195**:615-619.  
20  
21 21. Rechner, I, Lipman, J. The costs of caring for patients in a tertiary referral Australian  
22  
23 Intensive Care Unit. *Anaesth Intensive Care* 2005;**33**:477-482.  
24  
25  
26  
27  
28  
29  
30  
31  
32  
33  
34  
35  
36  
37  
38  
39  
40  
41  
42  
43  
44  
45  
46  
47  
48  
49  
50  
51  
52  
53  
54  
55  
56  
57  
58  
59  
60

1  
2  
3 **Tables**  
4

5 Table 1: Basic characteristics of the nine Queensland hospitals combined, patients with  
6 admission or discharge dates between 1 January 2005 and 31 December 2010. Results for all  
7 admissions and admissions by infection status.  
8  
9  
10

| <b>Admissions</b>                 | <b>Numbers</b> | <b>Patient age,<br/>median (IQR)</b> | <b>LoS in days,<br/>median (IQR)</b> | <b>In-hospital<br/>deaths (%)</b> |
|-----------------------------------|----------------|--------------------------------------|--------------------------------------|-----------------------------------|
| <b>All</b>                        | 2,725,515      | 53 (32, 69)                          | 1 (1, 4)                             | 1.1                               |
| <b>Those with an infection</b>    | 19,206         | 61 (44, 74)                          | 15 (6, 31)                           | 7.1                               |
| <b>Those without an infection</b> | 2,706,309      | 53 (32, 69)                          | 1 (1, 4)                             | 1.0                               |

11  
12  
13  
14  
15  
16  
17  
18  
19  
20  
21  
22 IQR = inter-quartile range, LoS = length of stay  
23  
24  
25  
26  
27  
28  
29  
30  
31  
32  
33  
34  
35  
36  
37  
38  
39  
40  
41  
42  
43  
44  
45  
46  
47  
48  
49  
50  
51  
52  
53  
54  
55  
56  
57  
58  
59  
60

Table 2: Risks of in-hospital death due to a hospital-acquired bloodstream infection. Based on nine hospitals with admissions between 1 January 2005 and 31 December 2010.

| Bloodstream infection        | Number of infections | Deaths in infections, n (%) | Controls | Deaths in controls, n (%) | Hazard ratio (95% CI) |
|------------------------------|----------------------|-----------------------------|----------|---------------------------|-----------------------|
| <b>BSI and gram positive</b> | 2,141                | 338 (15.8%)                 | 8,512    | 526 (6.2%)                | 3.0 (2.6, 3.5)        |
| <b>BSI with SAB</b>          |                      |                             |          |                           |                       |
| All                          | 744                  | 124 (16.7%)                 | 2,950    | 175 (5.9%)                | 3.5 (2.7, 4.6)        |
| MRSA                         | 189                  | 38 (20.1%)                  | 740      | 45 (6.1%)                 | 4.6 (2.7, 7.6)        |
| MSSA                         | 555                  | 86 (15.5%)                  | 2,218    | 121 (5.5%)                | 3.4 (2.5, 4.7)        |
| <b>BSI with CNS</b>          | 918                  | 139 (15.1%)                 | 3,640    | 219 (6.0%)                | 2.9 (2.3, 3.7)        |
| <b>BSI and gram negative</b> |                      |                             |          |                           |                       |
| All                          | 2,044                | 285 (13.9%)                 | 8,089    | 609 (7.5%)                | 2.1 (1.8, 2.4)        |
| <i>E. coli</i>               | 465                  | 57 (12.3%)                  | 1,838    | 130 (7.1%)                | 2.0 (1.4, 2.8)        |
| Pseudomonas                  | 449                  | 74 (16.5%)                  | 1,771    | 163 (9.2%)                | 2.2 (1.6, 3.0)        |

BSI = bloodstream infection, CI = confidence interval, CNS = coagulase-negative

staphylococci, MRSA = Methicillin-resistant *Staphylococcus aureus*, SAB = *Staphylococcus aureus* bacteremia.

Table 3: Extra length of stay (in days) in a standard bed and ICU bed due to a hospital-acquired bloodstream infection. Cells show the mean extra length of stay (in days) with 95% confidence intervals in parentheses. Based on nine hospitals with admissions between 1 January 2005 and 31 December 2010. Separate estimates were made for admissions that ended in death and discharge. The total length of stay is the standard bed time plus the ICU bed time (see Figure 2).

| Bloodstream Infection        | Standard bed       |                  | ICU bed         |                 |
|------------------------------|--------------------|------------------|-----------------|-----------------|
|                              | Died               | Discharged       | Died            | Discharged      |
| <b>BSI and gram positive</b> |                    |                  |                 |                 |
| <b>BSI with SAB</b>          |                    |                  |                 |                 |
| <b>All</b>                   | 1.0 (−3.9, 5.6)    | 9.8 (7.7, 12.6)  | 4.0 (2.6, 5.7)  | 0.9 (0.4, 1.8)  |
| <b>MRSA</b>                  | −1.5 (−6.8, 6.1)   | 12.1 (6.7, 15.3) | 1.4 (0.5, 3.0)  | 0.9 (0.1, 2.9)  |
| <b>MSSA</b>                  | −1.6 (−12.6, 12.6) | 12.8 (6.2, 26.1) | 3.1 (0.5, 7.2)  | 3.1 (0.4, 13.2) |
| <b>BSI with CNS</b>          | 2.7 (−2.6, 9.7)    | 11.0 (6.4, 14.9) | 0.7 (−0.3, 2.0) | 0.4 (0.0, 0.8)  |
| <b>BSI and gram negative</b> |                    |                  |                 |                 |
| <b>All</b>                   | 3.5 (−4.0, 13.4)   | 9.8 (3.6, 14.6)  | 6.0 (3.3, 10.0) | 1.4 (0.6, 2.5)  |
| <b><i>E. coli</i></b>        | −3.9 (−8.7, −0.4)  | 2.7 (−4.1, 6.1)  | 3.0 (1.4, 4.5)  | 0.6 (0.3, 1.0)  |
| <b><i>Pseudomonas</i></b>    | −3.3 (−9.3, 7.9)   | 1.1 (−13.2, 5.7) | 2.5 (0.4, 4.7)  | 0.5 (−0.1, 0.9) |
|                              | −5.4 (−11.6, 9.2)  | 5.6 (−6.4, 14.3) | 3.2 (0.8, 7.1)  | 0.5 (0.3, 1.2)  |

BSI = bloodstream infection, CI = confidence interval, CNS = coagulase-negative staphylococci, ICU = intensive care unit, MRSA = Methicillin-resistant *Staphylococcus aureus*, MSSA = Methicillin-sensitive *Staphylococcus aureus*, SAB = *Staphylococcus aureus* bacteremia.

**Figure legends**

Figure 1: Four-state model to estimate the extra risk of death and extra length of stay due to a hospital-acquired bloodstream infection. The arrows represent hazards in a survival model.

The extra risk of death was estimated using the hazard ratio of the hazard of death for infected patients (arrow A) and the hazard for susceptible patients (arrow C). The extra length of stay for those discharged alive was calculated by comparing the time take to discharge for infected patients (arrow B) with the time take to discharge for susceptible patients (arrow D)

Figure 2: Illustration of incidence density sampling for an infected case (patient E) and matched controls (patients A to C). The vertical dotted line shows the timing of infection.

The dashed lines show the periods of hospital stay before infection. These times are discarded, as only times after infection are used to estimate the extra length of stay. The thicker solid lines show time spent in ICU. Adapted from Wolkewitz et al (2009).

1  
2  
3  
4  
5  
6  
7  
8  
9  
10  
11  
12  
13  
14  
15  
16  
17  
18  
19  
20  
21  
22  
23  
24  
25  
26  
27  
28  
29  
30  
31  
32  
33  
34  
35  
36  
37  
38  
39  
40  
41  
42  
43  
44  
45  
46  
47  
48  
49  
50  
51  
52  
53  
54  
55  
56  
57  
58  
59  
60

.....  
  
.....  
  
.....

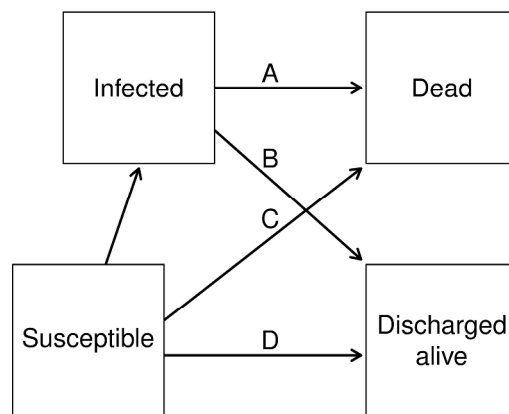

.....  
  
.....  
  
.....

Four-state model to estimate the extra risk of death and extra length of stay due to a hospital-acquired bloodstream infection. The arrows represent hazards in a survival model. The extra risk of death was estimated using the hazard ratio of the hazard of death for susceptible patients (arrow A) and the hazard for uninfected patients (arrow C). The extra length of stay for those discharged alive was calculated by comparing the time take to discharge for infected patients (arrow B) with the time take to discharge for susceptible patients (arrow D)

279x361mm (300 x 300 DPI)

1  
2  
3  
4  
5  
6  
7  
8  
9  
10  
11  
12  
13  
14  
15  
16  
17  
18  
19  
20  
21  
22  
23  
24  
25  
26  
27  
28  
29  
30  
31  
32  
33  
34  
35  
36  
37  
38  
39  
40  
41  
42  
43  
44  
45  
46  
47  
48  
49  
50  
51  
52  
53  
54  
55  
56  
57  
58  
59  
60

.....  
.....  
.....

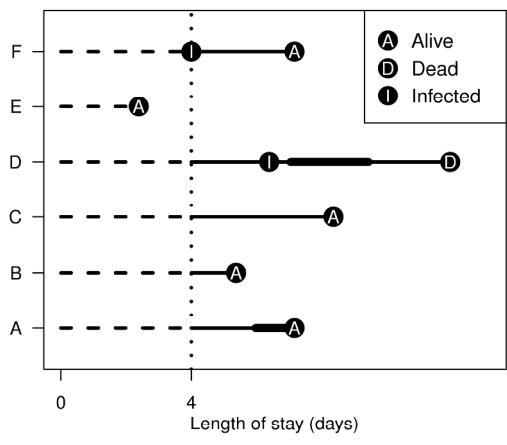

Illustration of incidence density sampling for an infected case (patient E) and matched controls (patients A to C). The vertical dotted line shows the timing of infection. The dashed lines show the periods of hospital stay before infection. These times are discarded, as only times after infection are used to estimate the extra length of stay. The thicker solid lines show time spent in ICU. Adapted from Wolkewitz et al (2009).  
 279x361mm (300 x 300 DPI)



STROBE Statement—Checklist of items that should be included in reports of *case-control studies*

|                              | Item No | Recommendation                                                                                                                                                                                                                                                                                                                                                                                                |                                       |
|------------------------------|---------|---------------------------------------------------------------------------------------------------------------------------------------------------------------------------------------------------------------------------------------------------------------------------------------------------------------------------------------------------------------------------------------------------------------|---------------------------------------|
| <b>Title and abstract</b>    | 1       | (a) Indicate the study's design with a commonly used term in the title or the abstract<br>(b) Provide in the abstract an informative and balanced summary of what was done and what was found                                                                                                                                                                                                                 | Page 1<br>Page 2                      |
| <b>Introduction</b>          |         |                                                                                                                                                                                                                                                                                                                                                                                                               |                                       |
| Background/rationale         | 2       | Explain the scientific background and rationale for the investigation being reported                                                                                                                                                                                                                                                                                                                          | Page 4                                |
| Objectives                   | 3       | State specific objectives, including any prespecified hypotheses                                                                                                                                                                                                                                                                                                                                              | Page 6                                |
| <b>Methods</b>               |         |                                                                                                                                                                                                                                                                                                                                                                                                               |                                       |
| Study design                 | 4       | Present key elements of study design early in the paper                                                                                                                                                                                                                                                                                                                                                       | Page 6 & Fig 1                        |
| Setting                      | 5       | Describe the setting, locations, and relevant dates, including periods of recruitment, exposure, follow-up, and data collection                                                                                                                                                                                                                                                                               | Page 4                                |
| Participants                 | 6       | (a) Give the eligibility criteria, and the sources and methods of case ascertainment and control selection. Give the rationale for the choice of cases and controls<br>(b) For matched studies, give matching criteria and the number of controls per case                                                                                                                                                    | Page 7 & Fig 2<br>Page 7              |
| Variables                    | 7       | Clearly define all outcomes, exposures, predictors, potential confounders, and effect modifiers. Give diagnostic criteria, if applicable                                                                                                                                                                                                                                                                      | Page 4                                |
| Data sources/<br>measurement | 8*      | For each variable of interest, give sources of data and details of methods of assessment (measurement). Describe comparability of assessment methods if there is more than one group                                                                                                                                                                                                                          | Pages 4-5                             |
| Bias                         | 9       | Describe any efforts to address potential sources of bias                                                                                                                                                                                                                                                                                                                                                     |                                       |
| Study size                   | 10      | Explain how the study size was arrived at                                                                                                                                                                                                                                                                                                                                                                     | Page 7                                |
| Quantitative variables       | 11      | Explain how quantitative variables were handled in the analyses. If applicable, describe which groupings were chosen and why                                                                                                                                                                                                                                                                                  | Pages 6-8                             |
| Statistical methods          | 12      | (a) Describe all statistical methods, including those used to control for confounding<br>(b) Describe any methods used to examine subgroups and interactions<br>(c) Explain how missing data were addressed<br>(d) If applicable, explain how matching of cases and controls was addressed<br>(e) Describe any sensitivity analyses                                                                           | Pages 6-8<br>NA<br>NA<br>Page 7<br>NA |
| <b>Results</b>               |         |                                                                                                                                                                                                                                                                                                                                                                                                               |                                       |
| Participants                 | 13*     | (a) Report numbers of individuals at each stage of study—eg numbers potentially eligible, examined for eligibility, confirmed eligible, included in the study, completing follow-up, and analysed<br>(b) Give reasons for non-participation at each stage<br>(c) Consider use of a flow diagram                                                                                                               | Tables 1 & 2<br>NA<br>NA              |
| Descriptive data             | 14*     | (a) Give characteristics of study participants (eg demographic, clinical, social) and information on exposures and potential confounders<br>(b) Indicate number of participants with missing data for each variable of interest                                                                                                                                                                               | Table 1<br>NA                         |
| Outcome data                 | 15*     | Report numbers in each exposure category, or summary measures of exposure                                                                                                                                                                                                                                                                                                                                     | Table 1                               |
| Main results                 | 16      | (a) Give unadjusted estimates and, if applicable, confounder-adjusted estimates and their precision (eg, 95% confidence interval). Make clear which confounders were adjusted for and why they were included<br>(b) Report category boundaries when continuous variables were categorized<br>(c) If relevant, consider translating estimates of relative risk into absolute risk for a meaningful time period | Tables 2 & 3<br>NA                    |

1  
2  
3  
4  
5  
6  
7  
8  
9  
10  
11  
12  
13  
14  
15  
16  
17  
18  
19  
20  
21  
22  
23  
24  
25  
26  
27  
28  
29  
30  
31  
32  
33  
34  
35  
36  
37  
38  
39  
40  
41  
42  
43  
44  
45  
46  
47  
48  
49  
50  
51  
52  
53  
54  
55  
56  
57  
58  
59  
60

|                          |    |                                                                                                                                                                            |             |
|--------------------------|----|----------------------------------------------------------------------------------------------------------------------------------------------------------------------------|-------------|
| Other analyses           | 17 | Report other analyses done—eg analyses of subgroups and interactions, and sensitivity analyses                                                                             | NA          |
| <b>Discussion</b>        |    |                                                                                                                                                                            |             |
| Key results              | 18 | Summarise key results with reference to study objectives                                                                                                                   | Pages 9-12  |
| Limitations              | 19 | Discuss limitations of the study, taking into account sources of potential bias or imprecision. Discuss both direction and magnitude of any potential bias                 | Pages 10-12 |
| Interpretation           | 20 | Give a cautious overall interpretation of results considering objectives, limitations, multiplicity of analyses, results from similar studies, and other relevant evidence | Page 12     |
| Generalisability         | 21 | Discuss the generalisability (external validity) of the study results                                                                                                      | Page 11     |
| <b>Other information</b> |    |                                                                                                                                                                            |             |
| Funding                  | 22 | Give the source of funding and the role of the funders for the present study and, if applicable, for the original study on which the present article is based              | Page 13     |

\*Give information separately for cases and controls.

**Note:** An Explanation and Elaboration article discusses each checklist item and gives methodological background and published examples of transparent reporting. The STROBE checklist is best used in conjunction with this article (freely available on the Web sites of PLoS Medicine at <http://www.plosmedicine.org/>, Annals of Internal Medicine at <http://www.annals.org/>, and Epidemiology at <http://www.epidem.com/>). Information on the STROBE Initiative is available at <http://www.strobe-statement.org>.



**The increased risks of death and extra lengths of hospital  
and ICU stay from hospital-acquired bloodstream infections:  
a case-control study**

|                                 |                                                                                                                                                                                                                                                                                                                                                                                                                                                                                                                                                                                                                                                                                                                                                                                                                                                                                                                                                                                                                                                                        |
|---------------------------------|------------------------------------------------------------------------------------------------------------------------------------------------------------------------------------------------------------------------------------------------------------------------------------------------------------------------------------------------------------------------------------------------------------------------------------------------------------------------------------------------------------------------------------------------------------------------------------------------------------------------------------------------------------------------------------------------------------------------------------------------------------------------------------------------------------------------------------------------------------------------------------------------------------------------------------------------------------------------------------------------------------------------------------------------------------------------|
| Journal:                        | <i>BMJ Open</i>                                                                                                                                                                                                                                                                                                                                                                                                                                                                                                                                                                                                                                                                                                                                                                                                                                                                                                                                                                                                                                                        |
| Manuscript ID:                  | bmjopen-2013-003587.R1                                                                                                                                                                                                                                                                                                                                                                                                                                                                                                                                                                                                                                                                                                                                                                                                                                                                                                                                                                                                                                                 |
| Article Type:                   | Research                                                                                                                                                                                                                                                                                                                                                                                                                                                                                                                                                                                                                                                                                                                                                                                                                                                                                                                                                                                                                                                               |
| Date Submitted by the Author:   | 22-Sep-2013                                                                                                                                                                                                                                                                                                                                                                                                                                                                                                                                                                                                                                                                                                                                                                                                                                                                                                                                                                                                                                                            |
| Complete List of Authors:       | Barnett, Adrian; Queensland University of Technology, Institute of Health and Biomedical Innovation<br>Page, Katie; Queensland University of Technology, Institute of Health and Biomedical Innovation<br>Campbell, Megan; Queensland University of Technology, Institute of Health and Biomedical Innovation<br>Martin, Elizabeth; Queensland University of Technology, Institute of Health and Biomedical Innovation<br>Rashleigh-Rolls, Rebecca; Royal Brisbane and Women's Hospital,<br>Halton, Kate; Queensland University of Technology, Institute of Health and Biomedical Innovation<br>Paterson, David; The University of Queensland Centre for Clinical Research,<br>Hall, Lisa; Queensland University of Technology, Institute of Health and Biomedical Innovation<br>Jimmieson, Nerina; The University of Queensland, School of Psychology<br>White, Katherine; Queensland University of Technology, Institute of Health and Biomedical Innovation<br>Graves, Nicholas; Queensland University of Technology, Institute of Health and Biomedical Innovation |
| <b>Primary Subject Heading</b>: | Infectious diseases                                                                                                                                                                                                                                                                                                                                                                                                                                                                                                                                                                                                                                                                                                                                                                                                                                                                                                                                                                                                                                                    |
| Secondary Subject Heading:      | Intensive care                                                                                                                                                                                                                                                                                                                                                                                                                                                                                                                                                                                                                                                                                                                                                                                                                                                                                                                                                                                                                                                         |
| Keywords:                       | INFECTIOUS DISEASES, GENERAL MEDICINE (see Internal Medicine), Health & safety < HEALTH SERVICES ADMINISTRATION & MANAGEMENT, INTENSIVE & CRITICAL CARE                                                                                                                                                                                                                                                                                                                                                                                                                                                                                                                                                                                                                                                                                                                                                                                                                                                                                                                |
|                                 |                                                                                                                                                                                                                                                                                                                                                                                                                                                                                                                                                                                                                                                                                                                                                                                                                                                                                                                                                                                                                                                                        |

SCHOLARONE™  
Manuscripts

1  
2  
3 **The increased risks of death and extra lengths of hospital and ICU stay from hospital-**  
4 **acquired bloodstream infections: a case-control study**  
5  
6  
7

8 Adrian G Barnett<sup>1</sup>, Katie Page<sup>1</sup>, Megan Campbell<sup>1</sup>, Elizabeth Martin<sup>1</sup>, Rebecca Rashleigh-  
9 Rolls<sup>1,2</sup>, Kate Halton<sup>1</sup>, David L Paterson<sup>3,4</sup>, Lisa Hall<sup>1,4</sup>, Nerina Jimmieson<sup>5</sup>,  
10  
11 Katherine White<sup>1</sup>, Nicholas Graves<sup>1,4</sup>  
12  
13

14  
15  
16 1 Institute of Health and Biomedical Innovation, Queensland University of Technology,  
17  
18 Queensland, Australia  
19

20 2 Royal Brisbane and Women's Hospital, Queensland, Australia  
21

22 3 The University of Queensland Centre for Clinical Research, Queensland, Australia  
23

24 4 Centre for Healthcare Related Infection Surveillance and Prevention, Queensland Health,  
25  
26 Queensland, Australia  
27  
28

29 5 School of Psychology, The University of Queensland, St Lucia, Queensland, Australia  
30  
31  
32  
33  
34

35 Corresponding address: Adrian G Barnett, Institute of Health and Biomedical Innovation,  
36  
37 Queensland University of Technology, 60 Musk Avenue, Kelvin Grove, Queensland 4059,  
38  
39 Australia. Phone: +61 7 3138 6010. Fax: +61 7 3138 6030. E-mail: [a.barnett@qut.edu.au](mailto:a.barnett@qut.edu.au).  
40  
41  
42  
43

44 Word count: 2,737  
45  
46  
47  
48  
49  
50  
51  
52  
53  
54  
55  
56  
57  
58  
59  
60

## Structured abstract

Objectives: Hospital-acquired bloodstream infections are known to increase the risk of death and prolong hospital stay, but precise estimates of these two important outcomes from well designed studies are rare, particularly for non-ICU patients. We aimed to calculate accurate estimates, which are vital for estimating the economic costs of hospital-acquired bloodstream infections.

Design: Case-control study.

Setting: Nine Australian public hospitals.

Participants: All admitted patients between 2005 and 2010.

Primary and secondary outcome measures: Risk of death and extra length of hospital stay associated with nosocomial infection.

Results: The greatest increase in the risk of death was for a bloodstream infection with Methicillin-resistant *Staphylococcus aureus* (hazard ratio = 4.6, 95% CI: 2.7, 7.6). This infection also had the longest extra length of stay to discharge in a standard bed (12.8 days, 95% CI: 6.2, 26.1 days). All eight bloodstream infections increased the length of stay in the ICU, with longer stays for patients who eventually died (mean increase: 0.7 to 6.0 days) compared with those who were discharged (mean increase: 0.4 to 3.1 days). The three most common organisms associated with gram negative infection were *E. Coli*, *Pseudomonas aeruginosa* and *Klebsiella pneumonia*.

Conclusions: Bloodstream infections are associated with an increased risk of death and longer hospital stay. Avoiding infections could save lives and free up valuable bed days.

## Article summary

### Article focus

- There are few accurate estimates of the increased risk of death and extra length of hospital stay after a hospital-acquired infection because of the frequent use of study designs that ignore the time-dependent bias.
- We used a multi-state approach to overcome the time-dependent bias.

### Key messages

- All eight of the bloodstream infections studied were associated with an increased risk of death and longer hospital stay.

### Strengths and limitations of this study

- We had an extremely large sample size, but with little detailed individual information. We could not therefore match or control for detailed individual characteristics, which may mean there is some residual confounding in our estimates.
- Our estimates will be useful for economic studies on the costs and health benefits of interventions that reduce hospital-acquired infections.

## INTRODUCTION

Hospital-acquired infections increase a patient's risk of death and prolong their hospital stay.<sup>1</sup> Accurate estimates of the increased risk of death and extra length of stay are rare because of the complex statistical analysis needed to avoid the potentially serious biases of ignoring the timing of infection.<sup>2,3</sup> There are few accurate estimates of the extra length of stay and increased risk of death due to bloodstream infections,<sup>4</sup> with most good estimates only for patients in intensive care. This is an important gap in our understanding of the complete burden of hospital-acquired bloodstream infections, particularly as death and length of stay are vital for estimating the economic costs of hospital-acquired infections.<sup>5-7</sup> Also, financial penalties are applied in some hospitals for any hospital-acquired bloodstream infection (not just central line associated bloodstream infection).

In this paper we used an analysis that accounts for the timing of infection and hence gives accurate estimates of the risk of death and extra length of stay. We examined eight types of hospital-acquired bloodstream infections using data from nine Australian hospitals over six years. We estimated the extra length of stay due to infections for both standard and intensive care unit (ICU) beds.

## METHODS

### Data

We examined the nine largest public hospitals in Queensland, Australia (see Table 1 for some descriptive statistics). We requested all patient admissions with an admission or discharge date between 1 January 2005 and 31 December 2010 from the Health Statistics Centre of Queensland Health. The infection data came from the Centre for Healthcare Related Infection Surveillance and Prevention (CHRISP), Queensland Health. The admission and infection data

1  
2  
3 were linked by Queensland Health staff using a unique patient unit record number and  
4  
5 infection date.  
6  
7

8 The data used included the dates of admission, discharge and infection (if any), and the dates  
9  
10 (if any) of admissions and discharges from intensive care. Data were also requested on  
11  
12 admitting hospital, patient age, principal diagnosis code (ICD-10) and outcome in three  
13  
14 categories: discharged alive, died or censored. Censored meant the outcome of the patient  
15  
16 was unknown, which occurred when: i) the patient was transferred to another hospital, ii) the  
17  
18 patient was discharged to some other facility, such as an aged care facility or medi-hotel. We  
19  
20 accounted for this censoring in our analyses using statistical censoring.  
21  
22  
23

24 CHRISP coordinates a statewide healthcare associated infection surveillance program, which  
25  
26 aggregates and assures data quality. The surveillance definitions and processes have been  
27  
28 refined and validated over ten years,<sup>8</sup> and are consistent with national and international  
29  
30 definitions. Hospitals monitor infections hospital-wide as detailed in the surveillance  
31  
32 manual.<sup>9</sup> The data undergo a central quality assurance check every six months, and the  
33  
34 observed numbers of infections are regularly compared with expected numbers. Hospitals  
35  
36 with numbers that are lower than the state-wide control limit are asked about their  
37  
38 surveillance processes.  
39  
40  
41  
42

43 Bloodstream infections were classified *a priori* into four non-mutually exclusive groups,  
44  
45 those due to: (1) *Staphylococcus aureus*, (2) coagulase negative staphylococci, (3) Gram  
46  
47 positive organisms and (4) Gram negative organisms. After examining the results from these  
48  
49 four groups we added four further subgroups, viz. *Staphylococcus aureus* infections were  
50  
51 split into Methicillin-resistant *Staphylococcus aureus* (MRSA) and Methicillin-sensitive  
52  
53 *Staphylococcus aureus* (MSSA), and Gram negative organisms were split into *E. coli* and  
54  
55 *Pseudomonas aeruginosa*, to examine a lower and higher virulence organism, respectively.  
56  
57  
58  
59  
60



1  
2  
3 The infection groups are not mutually exclusive, for example, bloodstream infections due to  
4  
5 *Staphylococcus aureus* were also classified in the Gram positive organism group.  
6  
7

8 Community associated infections were excluded. The portal of entry of bloodstream infection  
9  
10 (e.g., urinary tract infection, pneumonia, intra-abdominal infection, central line) was not  
11  
12 available.  
13

14  
15 The study was approved by the ethics committees of Queensland Health and Queensland  
16  
17 University of Technology. The Research Ethics Governance Unit for Queensland Health  
18  
19 approved the data collection and linkage process, number: HREC/10/QPAH/180.  
20  
21

## 22 23 **Statistical methods**

24  
25 The basis of our statistical model is shown in Figure 1. A patient's admission over time is  
26  
27 modelled using the four states, with all patients eventually dying or being discharged, and  
28  
29 some patients being infected. Using this multi-state model we can examine our two key  
30  
31 questions:  
32  
33

- 34  
35 1. By how much did a hospital-acquired bloodstream infection increase the risk of death?
- 36  
37 2. By how much did a hospital-acquired bloodstream infection increase the length of stay?
- 38  
39

### 40 41 *Incidence density sampling*

42  
43 We created a smaller group of infected and non-infected patients from the complete data  
44  
45 using incidence density sampling.<sup>10</sup> The incidence density sampling approach is illustrated in  
46  
47 Figure 2. Patient E is the infected case, whose infection occurred four days after their  
48  
49 admission. Patient D is not a potential control, as they were discharged alive before day four.  
50  
51 The other three patients (A to C) are all eligible controls as they were infection free at the  
52  
53 time of the case's infection. This includes patient C, who acquired an infection on a later day.  
54  
55  
56  
57  
58  
59  
60

1  
2  
3 The days in hospital after the infection (for both cases and controls) were used to estimate the  
4  
5 extra length of stay (solid lines in Figure 2). We examined the extra number of days in both  
6  
7 standard and intensive care beds (thin and thick lines in Figure 2, respectively). For patients  
8  
9 with multiple infections, we only considered their first infection. This was done to simplify  
10  
11 the analysis (as multiple infections would require another state in Figure 1), and because  
12  
13 there were relatively few admissions with multiple infections.  
14  
15

16  
17 Matching infected patients to control patients when estimating the extra length of stay due to  
18  
19 infection usually gives poor estimates because of the time-dependent bias.<sup>5</sup> This bias occurs  
20  
21 because the time before infection is used when estimating the extra length of stay (dashed  
22  
23 horizontal lines in Figure 2). However, unlike traditional matching studies, we used incidence  
24  
25 density sampling, which also matches on the timing of infection because potential controls  
26  
27 must have been infection free at the time of the case's infection.<sup>10</sup>  
28  
29

30  
31 To make comparable groups of patients in terms of morbidity we matched infected cases to  
32  
33 controls who: had the same first letter in the principal diagnosis code (using ICD-10 coding),  
34  
35 were of a similar age (within 10 years), were at the same hospital, and were infection free at  
36  
37 the time of the case's infection. We randomly selected four controls for each infected patient.  
38  
39

#### 40 41 *Statistical power*

42  
43 The study had a 90% power to detect an increased hazard ratio of 1.40 (40%) for infected  
44  
45 versus uninfected patients using the smallest number of infections of 189 for MRSA, and an  
46  
47 increased hazard ratios of 1.18 (18%) for the second smallest number of infections of 744.  
48  
49

50 These calculations assumed a two-sided 5% significance level.  
51

52  
53 We only examined the risk of in-hospital death, as we had no information on patients after  
54  
55 discharge.  
56  
57

### *Extra length of stay*

We estimated the extra length of stay due to infection using the following steps. We calculated the number of days from infection to discharge for cases, and the number of days from the case's infection to discharge for its four matched controls. We then subtracted the case's length of stay from the average length of stay for its matched controls, with separate estimates for stays in standard and ICU beds. We then averaged these individual extra lengths of stay over all cases. These averages were stratified to create separate estimates for patients discharged alive and dead.

There are no parametric equations for calculating confidence intervals for the extra length of stay, hence we used a bootstrap method to generate a 95% confidence interval.<sup>11</sup> We randomly selected sets of cases and matched controls with replacement, creating a random sample with the same sample size as the original data. We repeated this random selection 1,000 times.

All analyses were conducted in R version 2.15.0 using the "survival" library.

## **RESULTS**

### *Hazard ratios*

The hazard ratios (HRs) for the eight bloodstream infections are in Table 2. All eight infections increased the risk of death, with the largest risk for MRSA (HR = 4.6) and the smallest for gram negative BSI (HR = 2.1). The increases were statistically significant for all eight infections, as the lower limits of the 95% confidence intervals were all above 1. The greatest number of infections was 2,141 for gram positive BSI, and the smallest number was 189 for MRSA.

### *Extra length of stay*

1  
2  
3 The extra lengths of stay for the eight bloodstream infections are in Table 3. For patients that  
4 died, there was no extra length of stay in a standard bed (as all the 95% confidence intervals  
5 include zero). For patients discharged alive, infection was associated with an extra length of  
6 stay in a standard bed for every type of bloodstream infection except the gram negative BSIs.  
7  
8 The longest extra length of stay to discharge in a standard bed was 12.8 days for MRSA  
9  
10 (95% CI: 6.2, 26.1 days). The 95% confidence intervals are noticeably wider for infections  
11  
12 with smaller numbers.  
13  
14  
15  
16  
17

18  
19 Most of the bloodstream infection types were associated with an extra length of stay in ICU  
20  
21 for both patients that lived and died (Table 3). The extra lengths of stay were generally longer  
22  
23 for those patients that died. The longest extra length of stay to death in an ICU bed was 6.0  
24  
25 days for a BSI with CNS (95% CI: 3.3, 10.0 days).  
26  
27

## 28 29 **CONCLUSION**

30  
31  
32 This is one of the largest studies to estimate the increased length of stay and risk of death due  
33  
34 to hospital-acquired infection.<sup>4</sup> All eight bloodstream infection types studied increased the  
35  
36 risk of death and most led to extra days in intensive care. Five of the bloodstream infections  
37  
38 also prolonged stay in a standard hospital bed by an average of between 9.8 and 12.8 days.  
39  
40 The eight hospital-acquired infections studied therefore significantly increased mortality and  
41  
42 morbidity.  
43  
44

45  
46 Gram negative infections had generally shorter extra lengths of stay and lower risks of death  
47  
48 compared with the other infection types. The three most common organisms associated with  
49  
50 gram negative infection were *E. Coli*, *Pseudomonas aeruginosa* and *Klebsiella pneumoniae*.  
51

52  
53 There were no clear differences between patients with a gram positive and gram negative  
54  
55 infection in terms of their age or primary diagnosis (data not shown). BSI with CNS had a  
56  
57  
58  
59  
60

1  
2  
3 higher death risk (HR=2.9) than Gram-negative BSIs (HR=2.1), which could reflect the  
4  
5 higher risk of organ failure.<sup>12</sup>  
6  
7

8  
9 The average extra lengths of stay after infection were shorter for ICU bed days compared  
10  
11 with ward bed days for all infections, which is expected as the average extra length of stay is  
12  
13 proportional to the average total length of stay.<sup>2</sup>  
14

15  
16 MRSA was associated with the largest increased risk of death (HR = 4.6) and the largest  
17  
18 increase in length of stay for a standard bed (12.8 days for those discharged alive). BSI with  
19  
20 CNS had the largest increased length of stay in an ICU bed of 6.0 days for patients who died  
21  
22 and 1.4 days for patients discharged alive. These estimates of hazard ratio and length of stay  
23  
24 are similar to those from related studies that account for the time-dependent bias. A study in  
25  
26 European hospitals found hazard ratios of 3.5 due to MRSA BSI and 3.1 for MSSA BSI, with  
27  
28 an extra length of stay of 9.2 days for MRSA BSI and 8.6 days for MSSA BSI.<sup>13</sup> Results  
29  
30 from ICUs in 10 European countries gave estimated hazard ratios for BSIs ranging from 2.1  
31  
32 to 4.4 depending on the organism, and extra lengths of stay in ICU ranging from -0.1 to 3.7  
33  
34 days.<sup>1</sup> ICUs in France had an estimated odds ratio for death of 3.2 due to a BSI infection,  
35  
36 with a lower odds ratio of 2.7 for those who received appropriate treatment.<sup>14</sup>  
37  
38  
39

#### 40 41 ***Study limitations*** 42

43  
44 We used a large routinely collected data set of all hospital admissions. Larger data sets give  
45  
46 more statistical power, but are often not as detailed or error-free as prospectively collected  
47  
48 data. The hospital admission data used here are subject to data checking at the time of entry,  
49  
50 and we subjected the data to further logical checks and found no errors.  
51  
52

53  
54 We matched controls to cases using the first letter of ICD-10 code so that controls and cases  
55  
56 were broadly similar in terms of morbidity. It is possible that even after the matching, the  
57  
58  
59  
60

1  
2  
3 infected cases were sicker than the controls (prior to the infection) and that this somewhat  
4 explains the cases' extra length of stay and increased risk of death. However, adjusting for  
5 the timing of infection (which we did) is far more important than adjusting for baseline  
6 morbidity when estimating the extra length of stay due to infection.<sup>15</sup>  
7  
8  
9

10  
11  
12 Despite using hospital-wide surveillance, some infections may have been missed. The  
13 surveillance relies on clinical testing, so an infected but untested patient would be missed.  
14  
15 However, collection of blood cultures is standard for patients with a fever during  
16 hospitalisation.  
17  
18  
19

20  
21  
22 Our results should be generalisable to other settings, but it is possible that differences will  
23 occur depending on how infections are managed. For example, some hospitals use hospital in  
24 the home schemes, where infected patients can be cared for at home rather than in the  
25 hospital.<sup>16</sup> Caring for infected patients in their own home would reduce the extra length of  
26 hospital stay due to infection. Unfortunately we did not have data on the use of hospital in the  
27 home, and so could not estimate the entire patient journey. If we had this data it could have  
28 been added as another state to the multi-state model in Figure 1.  
29  
30  
31  
32  
33  
34  
35  
36

37  
38 We had no data on why the extra length of stay occurred. For example, the extra lengths of  
39 stay may be directly due to the increased morbidity of infection or they could be due to a  
40 change in patient management, such as the use of defined durations of intravenous antibiotics  
41 (such as for *Staphylococcus aureus* bloodstream infection). It is also possible that the total  
42 extra length of stay after bloodstream infection is not solely due to the infection. For  
43 example, a patient's stay is initially extended because of a bloodstream infection, then during  
44 this extra stay an unrelated adverse event happens, for example an adverse drug reaction that  
45 keeps them in hospital for longer.<sup>17</sup> To further investigate extra length of stay due to  
46 infection, we recommend a detailed individual study that follows patients from the time of  
47  
48  
49  
50  
51  
52  
53  
54  
55  
56  
57  
58  
59  
60

1  
2  
3 their infection to discharge, and details the decisions made and resources used.<sup>18</sup> In some  
4  
5 hospitals this is already collected using a post-infection review.  
6  
7

### 8 *Study strengths*

9

10  
11 This is one of the first studies to accurately estimate the extra length of stay due to  
12  
13 bloodstream infection in a standard hospital bed, as most previous good estimates only  
14  
15 examined ICU beds. This is important because days in hospital are costly so extra length of  
16  
17 stay is key to determining the economic costs of infection,<sup>19</sup> as well as being an important  
18  
19 measure of morbidity. ICU beds have a far greater economic cost than standard beds, so it is  
20  
21 vital to get separate estimates for ward and ICU beds.<sup>20</sup>  
22  
23

24  
25 Our results can be used to inform parameters for studies of the cost-effectiveness of  
26  
27 interventions that reduce risks of hospital-acquired infection. This is the most useful  
28  
29 application of estimates, as only describing the size of the cost does not help decision-makers,  
30  
31 although it might get the attention of politicians and the media in the short-term. Also,  
32  
33 erroneous estimates of these parameters might have misled decision making in the past.<sup>5</sup> The  
34  
35 application of a multi-state modelling approach (Figure 1), which appropriately classifies  
36  
37 patient risks over time should become the gold standard method for these studies.<sup>3</sup>  
38  
39

40  
41 A key parameter in cost-effectiveness models is the extra number of deaths, as the years of  
42  
43 life lost have a potentially large economic cost. We found that all eight types of bloodstream  
44  
45 infections increased the risk of death. Avoiding infections is therefore likely to both save  
46  
47 lives and free up valuable bed days.  
48  
49

#### 50 **What is already known on this subject?**

51  
52 Hospital-acquired bloodstream infections are thought to increase the risk of death and lead to  
53  
54 longer stays in hospital. The only previous estimates of the risks to date have been: biased by  
55  
56  
57  
58  
59  
60

1  
2  
3 poor statistical methods, or only applicable to patients in intensive care units.  
4

5 **What this study adds?**  
6

7 This is the first study to accurately estimate the risks of death and extra length of stay in a  
8 hospital population. These estimates will be vital for cost-effectiveness analyses of  
9 interventions in hospital that aim to reduce infections (e.g., alternative cleaning regimes).  
10  
11  
12  
13

14 **Acknowledgements:** Thanks to all the hospital Infection Control Practitioners for  
15 undertaking the HAI surveillance used for this analysis. Thanks also to the staff at  
16 Queensland Health in the Health Statistics Centre and Centre for Healthcare Related Infection  
17 Surveillance and Prevention, for providing and merging the hospital and infection data.  
18  
19

20 Computational resources and services used in this work were provided by the High  
21 Performance Computer and Research Support Unit, Queensland University of Technology,  
22 Brisbane, Australia.  
23  
24

25 **Competing interests:** None.  
26  
27

28 **Funding:** This work was supported by a National Health and Medical Research Council  
29 partnership grant (number 553081) with financial and in kind support from: Australian  
30 Commission on Safety and Quality in Health Care, Hand Hygiene Australia, and  
31 jurisdictional health departments. The Centre for Healthcare Related Infection Surveillance  
32 and Prevention, Communicable Diseases Branch, Queensland Health, supports the salaries of  
33 N.G. and D.L.P. K.P.'s salary comes from the National Health and Medical Research Council  
34 partnership grant.  
35  
36  
37  
38  
39  
40  
41  
42  
43  
44  
45  
46  
47  
48  
49  
50  
51  
52  
53  
54  
55  
56  
57  
58  
59  
60



1  
2  
3  
4  
5  
6 **Contributorship:** The study was motivated by an ongoing economic evaluation involving all  
7  
8 authors. AGB ran the statistical analysis and wrote the first draft and is the paper's guarantor. KP,  
9  
10 MC, LH, DLP and NG gave critical input into the study design. All authors read the first draft and  
11  
12 provided edits.  
13  
14  
15  
16  
17  
18  
19  
20  
21  
22  
23  
24  
25  
26  
27  
28  
29  
30  
31  
32  
33  
34  
35  
36  
37  
38  
39  
40  
41  
42  
43  
44  
45  
46  
47  
48  
49  
50  
51  
52  
53  
54  
55  
56  
57  
58  
59  
60

For peer review only

## References

1. Lambert, M-L, Suetens, C, Savey, A, *et al.* Clinical outcomes of health-care-associated infections and antimicrobial resistance in patients admitted to European intensive-care units: a cohort study. *Lancet Infect Dis* 2011;**11**:30-38.
2. Barnett, AG, Beyersmann, J, Allignol, A, Rosenthal, VD, Graves, N, Wolkewitz, M. The Time-Dependent Bias and its Effect on Extra Length of Stay due to Nosocomial Infection. *Value in Health* 2011;**14**:381-386.
3. Beyersmann, J, Gastmeier, P, Grundmann, H, *et al.* Use of multistate models to assess prolongation of intensive care unit stay due to nosocomial infection. *Infect Control Hosp Epidemiol* 2006;**27**:493-499.
4. Crnich, C. Estimating excess length of stay due to central line-associated bloodstream infection: separating the wheat from the chaff. *Infect Control Hosp Epidemiol* 2010;**31**:1115–1117.
5. Graves, N, Harbarth, S, Beyersmann, J, Barnett, A, Halton, K, Cooper, B. Estimating the Cost of Health Care-Associated Infections: Mind Your p's and q's. *Clinical Infectious Diseases* 2010;**50**:1017-1021.
6. Halton, KA, Cook, D, Paterson, DL, Safdar, N, Graves, N. Cost-Effectiveness of a Central Venous Catheter Care Bundle. *PLoS ONE* 2010;**5**:e12815.
7. Graves, N, Halton, K, Doidge, S, Clements, A, Lairson, D, Whitby, M. Who bears the cost of healthcare-acquired surgical site infection? *Journal of Hospital Infection* 2008;**69**:274-282.
8. Morton, AP, Clements, AC, Doidge, SR, Stackelroth, J, Curtis, M, Whitby, M. Surveillance of Healthcare-Acquired Infections in Queensland, Australia: Data and Lessons From the First 5 Years. *Infect Control Hosp Epidemiol* 2008;**29**:695-701.

- 1  
2  
3 9. Centre for Healthcare Related Infection Surveillance and Prevention, *Surveillance*  
4  
5 *Manual*. 2009, Queensland Health.
- 6  
7 10. Wolkewitz, M, Beyersmann, J, Gastmeier, P, Schumacher, M. Efficient Risk Set  
8  
9 Sampling when a Time-dependent Exposure Is Present. *Methods Inf Med* 2009;**48**:438–  
10  
11 443.
- 12  
13 11. Davison, AC, Hinkley, DV, *Bootstrap Methods and Their Application*: Cambridge  
14  
15 University Press; 1997.
- 16  
17 12. Savithri, MB, Iyer, V, Jones, M, *et al*. Epidemiology and significance of coagulase-  
18  
19 negative staphylococci isolated in blood cultures from critically ill adult patients. *Crit*  
20  
21 *Care Resusc* 2011;**13**:103-107.
- 22  
23 13. de Kraker, MEA, Wolkewitz, M, Davey, PG, Grundmann, H. Clinical Impact of  
24  
25 Antimicrobial Resistance in European Hospitals: Excess Mortality and Length of Hospital  
26  
27 Stay Related to Methicillin-Resistant Staphylococcus aureus Bloodstream Infections.  
28  
29 *Antimicrob Agents Chemother* 2011;**55**:1598-1605.
- 30  
31 14. Garrouste-Orgeas, M, Timsit, JF, Tafflet, M, *et al*. Excess Risk of Death from  
32  
33 Intensive Care Unit—Acquired Nosocomial Bloodstream Infections: A Reappraisal.  
34  
35 *Clinical Infectious Diseases* 2006;**42**:1118-1126.
- 36  
37 15. Beyersmann, J, Kneib, T, Schumacher, M, Gastmeier, P. Nosocomial Infection,  
38  
39 Length of Stay, and Time-Dependent Bias. *Infection Control and Hospital Epidemiology*  
40  
41 2009;**30**:273-276.
- 42  
43 16. Howden, BP, Grayson, ML. Hospital-in-the-home treatment of infectious diseases.  
44  
45 *Med J Aust* 2002;**176** 440-445.
- 46  
47 17. Hauck, K, Zhao, X. How Dangerous is a Day in Hospital?: A Model of Adverse  
48  
49 Events and Length of Stay for Medical Inpatients. *Med Care* 2011;**49**:1068-1075.  
50  
51  
52  
53  
54  
55  
56  
57  
58  
59  
60

- 1  
2  
3 18. Collignon, PJ, Wilkinson, IJ, Gilbert, GL, Grayson, ML, Whitby, RM. Health care-  
4 associated Staphylococcus aureus bloodstream infections: a clinical quality indicator for  
5 all hospitals. *Med J Aust* 2006;**184**:404-406.  
6  
7  
8  
9  
10 19. Grayson, ML, Russo, PL, Cruickshank, M, *et al*. Outcomes from the first 2 years of  
11 the Australian National Hand Hygiene Initiative. *Med J Aust* . 2011;**195**:615-619.  
12  
13  
14 20. Rechner, I, Lipman, J. The costs of caring for patients in a tertiary referral Australian  
15 Intensive Care Unit. *Anaesth Intensive Care* 2005;**33**:477-482.  
16  
17  
18  
19  
20  
21  
22  
23  
24  
25  
26  
27  
28  
29  
30  
31  
32  
33  
34  
35  
36  
37  
38  
39  
40  
41  
42  
43  
44  
45  
46  
47  
48  
49  
50  
51  
52  
53  
54  
55  
56  
57  
58  
59  
60

1  
2  
3 **Tables**  
4

5 Table 1: Basic characteristics of the nine Queensland hospitals combined, patients with  
6  
7 admission or discharge dates between 1 January 2005 and 31 December 2010. Results for all  
8  
9 admissions and admissions by infection status.  
10

| <b>Admissions</b>                 | <b>Numbers</b> | <b>Patient age,<br/>median (IQR)</b> | <b>LoS in days,<br/>median (IQR)</b> | <b>In-hospital<br/>deaths (%)</b> |
|-----------------------------------|----------------|--------------------------------------|--------------------------------------|-----------------------------------|
| <b>All</b>                        | 2,725,515      | 53 (32, 69)                          | 1 (1, 4)                             | 1.1                               |
| <b>Those with an infection</b>    | 19,206         | 61 (44, 74)                          | 15 (6, 31)                           | 7.1                               |
| <b>Those without an infection</b> | 2,706,309      | 53 (32, 69)                          | 1 (1, 4)                             | 1.0                               |

11  
12  
13  
14  
15  
16  
17  
18  
19  
20  
21  
22 IQR = inter-quartile range, LoS = length of stay  
23  
24  
25  
26  
27  
28  
29  
30  
31  
32  
33  
34  
35  
36  
37  
38  
39  
40  
41  
42  
43  
44  
45  
46  
47  
48  
49  
50  
51  
52  
53  
54  
55  
56  
57  
58  
59  
60

Table 2: Risks of in-hospital death due to a hospital-acquired bloodstream infection. Based on nine hospitals with admissions between 1 January 2005 and 31 December 2010.

| Bloodstream infection        | Number of infections | Deaths in infections, n (%) | Controls | Deaths in controls, n (%) | Hazard ratio (95% CI) |
|------------------------------|----------------------|-----------------------------|----------|---------------------------|-----------------------|
| <b>BSI and gram positive</b> | 2,141                | 338 (15.8%)                 | 8,512    | 526 (6.2%)                | 3.0 (2.6, 3.5)        |
| <b>BSI with SAB</b>          |                      |                             |          |                           |                       |
| All                          | 744                  | 124 (16.7%)                 | 2,950    | 175 (5.9%)                | 3.5 (2.7, 4.6)        |
| MRSA                         | 189                  | 38 (20.1%)                  | 740      | 45 (6.1%)                 | 4.6 (2.7, 7.6)        |
| MSSA                         | 555                  | 86 (15.5%)                  | 2,218    | 121 (5.5%)                | 3.4 (2.5, 4.7)        |
| <b>BSI with CNS</b>          | 918                  | 139 (15.1%)                 | 3,640    | 219 (6.0%)                | 2.9 (2.3, 3.7)        |
| <b>BSI and gram negative</b> |                      |                             |          |                           |                       |
| All                          | 2,044                | 285 (13.9%)                 | 8,089    | 609 (7.5%)                | 2.1 (1.8, 2.4)        |
| <i>E. coli</i>               | 465                  | 57 (12.3%)                  | 1,838    | 130 (7.1%)                | 2.0 (1.4, 2.8)        |
| <i>Pseudomonas</i>           | 449                  | 74 (16.5%)                  | 1,771    | 163 (9.2%)                | 2.2 (1.6, 3.0)        |

BSI = bloodstream infection, CI = confidence interval, CNS = coagulase-negative

staphylococci, MRSA = Methicillin-resistant *Staphylococcus aureus*, SAB = *Staphylococcus aureus* bacteremia.

Table 3: Extra length of stay (in days) in a standard bed and ICU bed due to a hospital-acquired bloodstream infection. Cells show the mean extra length of stay (in days) with 95% confidence intervals in parentheses. Based on nine hospitals with admissions between 1 January 2005 and 31 December 2010. Separate estimates were made for admissions that ended in death and discharge. The total length of stay is the standard bed time plus the ICU bed time (see Figure 2).

| Bloodstream Infection        | Standard bed       |                  | ICU bed         |                 |
|------------------------------|--------------------|------------------|-----------------|-----------------|
|                              | Died               | Discharged       | Died            | Discharged      |
| <b>BSI and gram positive</b> |                    |                  |                 |                 |
| <b>BSI with SAB</b>          |                    |                  |                 |                 |
| <b>All</b>                   | 1.0 (−3.9, 5.6)    | 9.8 (7.7, 12.6)  | 4.0 (2.6, 5.7)  | 0.9 (0.4, 1.8)  |
| <b>MRSA</b>                  | −1.5 (−6.8, 6.1)   | 12.1 (6.7, 15.3) | 1.4 (0.5, 3.0)  | 0.9 (0.1, 2.9)  |
| <b>MSSA</b>                  | −1.6 (−12.6, 12.6) | 12.8 (6.2, 26.1) | 3.1 (0.5, 7.2)  | 3.1 (0.4, 13.2) |
| <b>BSI with CNS</b>          | 2.7 (−2.6, 9.7)    | 11.0 (6.4, 14.9) | 0.7 (−0.3, 2.0) | 0.4 (0.0, 0.8)  |
| <b>BSI and gram negative</b> |                    |                  |                 |                 |
| <b>All</b>                   | 3.5 (−4.0, 13.4)   | 9.8 (3.6, 14.6)  | 6.0 (3.3, 10.0) | 1.4 (0.6, 2.5)  |
| <b><i>E. coli</i></b>        | −3.9 (−8.7, −0.4)  | 2.7 (−4.1, 6.1)  | 3.0 (1.4, 4.5)  | 0.6 (0.3, 1.0)  |
| <b><i>Pseudomonas</i></b>    | −3.3 (−9.3, 7.9)   | 1.1 (−13.2, 5.7) | 2.5 (0.4, 4.7)  | 0.5 (−0.1, 0.9) |
|                              | −5.4 (−11.6, 9.2)  | 5.6 (−6.4, 14.3) | 3.2 (0.8, 7.1)  | 0.5 (0.3, 1.2)  |

BSI = bloodstream infection, CI = confidence interval, CNS = coagulase-negative staphylococci, ICU = intensive care unit, MRSA = Methicillin-resistant *Staphylococcus aureus*, MSSA = Methicillin-sensitive *Staphylococcus aureus*, SAB = *Staphylococcus aureus* bacteremia.

**Figure legends**

Figure 1: Four-state model to estimate the extra risk of death and extra length of stay due to a hospital-acquired bloodstream infection. The arrows represent hazards in a survival model.

The extra risk of death was estimated using the hazard ratio of the hazard of death for infected patients (arrow A) and the hazard for susceptible patients (arrow C). The extra length of stay for those discharged alive was calculated by comparing the time take to discharge for infected patients (arrow B) with the time take to discharge for susceptible patients (arrow D)

Figure 2: Illustration of incidence density sampling for an infected case (patient E) and matched controls (patients A to C). The vertical dotted line shows the timing of infection.

The dashed lines show the periods of hospital stay before infection. These times are discarded, as only times after infection are used to estimate the extra length of stay. The thicker solid lines show time spent in ICU. Adapted from Wolkewitz et al (2009).



1  
2  
3 **The increased risks of death and extra lengths of hospital and ICU stay from hospital-**  
4 **acquired bloodstream infections: a case-control study**  
5  
6  
7

8 Adrian G Barnett<sup>1</sup>, Katie Page<sup>1</sup>, Megan Campbell<sup>1</sup>, Elizabeth Martin<sup>1</sup>, Rebecca Rashleigh-  
9  
10 Rolls<sup>1,2</sup>, Kate Halton<sup>1</sup>, David L Paterson<sup>3,4</sup>, Lisa Hall<sup>1,4</sup>, Nerina Jimmieson<sup>5</sup>,  
11  
12 Katherine White<sup>1</sup>, Nicholas Graves<sup>1,4</sup>  
13

14  
15  
16 1 Institute of Health and Biomedical Innovation, Queensland University of Technology,  
17  
18 Queensland, Australia  
19

20 2 Royal Brisbane and Women's Hospital, Queensland, Australia  
21

22 3 The University of Queensland Centre for Clinical Research, Queensland, Australia  
23

24  
25 4 Centre for Healthcare Related Infection Surveillance and Prevention, Queensland Health,  
26  
27 Queensland, Australia  
28

29  
30 5 School of Psychology, The University of Queensland, St Lucia, Queensland, Australia  
31  
32

33  
34  
35 Corresponding address: Adrian G Barnett, Institute of Health and Biomedical Innovation,  
36  
37 Queensland University of Technology, 60 Musk Avenue, Kelvin Grove, Queensland 4059,  
38  
39 Australia. Phone: +61 7 3138 6010. Fax: +61 7 3138 6030. E-mail: [a.barnett@qut.edu.au](mailto:a.barnett@qut.edu.au).  
40  
41  
42

43  
44 | Word count: 2,7937  
45  
46  
47  
48  
49  
50  
51  
52  
53  
54  
55  
56  
57  
58  
59  
60

## Structured abstract

Objectives: Hospital-acquired bloodstream infections are known to increase the risk of death and prolong hospital stay, but precise estimates of these two important outcomes from well designed studies are rare, particularly for non-ICU patients. We aimed to calculate accurate estimates, which are vital for estimating the economic costs of hospital-acquired bloodstream infections.

Design: Case-control study.

Setting: Nine Australian public hospitals.

Participants: All admitted patients between 2005 and 2010.

Primary and secondary outcome measures: Risk of death and extra length of hospital stay associated with nosocomial infection.

Results: The greatest increase in the risk of death was for a bloodstream infection with Methicillin-resistant *Staphylococcus aureus* (hazard ratio = 4.6, 95% CI: 2.7, 7.6). This infection also had the longest extra length of stay to discharge in a standard bed (12.8 days, 95% CI: 6.2, 26.1 days). All eight bloodstream infections increased the length of stay in the ICU, with longer stays for patients who eventually died (mean increase: 0.7 to 6.0 days) compared with those who were discharged (mean increase: 0.4 to 3.1 days). The three most common organisms associated with gram negative infection were *E. Coli*, *Pseudomonas aeruginosa* and *Klebsiella pneumonia*.

Conclusions: Bloodstream infections are associated with an increased risk of death and longer hospital stay. Avoiding infections could save lives and free up valuable bed days.

## Article summary

### Article focus

- There are few accurate estimates of the increased risk of death and extra length of hospital stay after a hospital-acquired infection because of the frequent use of study designs that ignore the time-dependent bias.
- We used a multi-state approach to overcome the time-dependent bias.

### Key messages

- All eight of the bloodstream infections studied were associated with an increased risk of death and longer hospital stay.

### Strengths and limitations of this study

- We had an extremely large sample size, but with little detailed individual information. We could not therefore match or control for detailed individual characteristics, which may mean there is some residual confounding in our estimates.
- Our estimates will be useful for economic studies on the costs and health benefits of interventions that reduce hospital-acquired infections.

## INTRODUCTION

Hospital-acquired infections increase a patient's risk of death and prolong their hospital stay.<sup>1</sup> Accurate estimates of the increased risk of death and extra length of stay are rare because of the complex statistical analysis needed to avoid the potentially serious biases of ignoring the timing of infection.<sup>2,3</sup> There are few accurate estimates of the extra length of stay and increased risk of death due to bloodstream infections,<sup>4</sup> with most good estimates only for patients in intensive care. This is an important gap in our understanding of the complete burden of hospital-acquired bloodstream infections, particularly as death and length of stay are vital for estimating the economic costs of hospital-acquired infections.<sup>5-7</sup> Also, financial penalties are applied in some hospitals for any hospital-acquired bloodstream infection (not just central line associated bloodstream infection).

In this paper we used an analysis that accounts for the timing of infection and hence gives accurate estimates of the risk of death and extra length of stay. We examined eight types of hospital-acquired bloodstream infections using data from nine Australian hospitals over six years. We estimated the extra length of stay due to infections for both standard and intensive care unit (ICU) beds.

## METHODS

### Data

We examined the nine largest public hospitals in Queensland, Australia (see Table 1 for some descriptive statistics). We requested all patient admissions with an admission or discharge date between 1 January 2005 and 31 December 2010 from the Health Statistics Centre of Queensland Health. The infection data came from the Centre for Healthcare Related Infection Surveillance and Prevention (CHRISP), Queensland Health. The admission and infection data

1  
2  
3 were linked by Queensland Health staff using a unique patient unit record number and  
4  
5 infection date.  
6  
7

8 The data used included the dates of admission, discharge and infection (if any), and the dates  
9  
10 (if any) of admissions and discharges from intensive care. Data were also requested on  
11  
12 admitting hospital, patient age, principal diagnosis code (ICD-10) and outcome in three  
13  
14 categories: discharged alive, died or censored. Censored meant the outcome of the patient  
15  
16 was unknown, which occurred when: i) the patient was transferred to another hospital, ii) the  
17  
18 patient was discharged to some other facility, such as an aged care facility or medi-hotel. We  
19  
20 accounted for this censoring in our analyses using statistical censoring.  
21  
22  
23

24 CHRISP coordinates a statewide healthcare associated infection surveillance program, which  
25  
26 aggregates and assures data quality. The surveillance definitions and processes have been  
27  
28 refined and validated over ten years,<sup>8</sup> and are consistent with national and international  
29  
30 definitions. Hospitals monitor infections hospital-wide as detailed in the surveillance  
31  
32 manual.<sup>9</sup> The data undergo a central quality assurance check every six months, and the  
33  
34 observed numbers of infections are regularly compared with expected numbers. Hospitals  
35  
36 with numbers that are lower than the state-wide control limit are asked about their  
37  
38 surveillance processes.  
39  
40  
41  
42

43 Bloodstream infections were classified *a priori* into four non-mutually exclusive groups,  
44  
45 those due to: (1) *Staphylococcus aureus*, (2) coagulase negative staphylococci, (3) Gram  
46  
47 positive organisms and (4) Gram negative organisms. After examining the results from these  
48  
49 four groups we added four further subgroups, viz. *Staphylococcus aureus* infections were  
50  
51 split into Methicillin-resistant *Staphylococcus aureus* (MRSA) and Methicillin-sensitive  
52  
53 *Staphylococcus aureus* (MSSA), and Gram negative organisms were split into *E. coli* and  
54  
55 *Pseudomonas aeruginosa*, to examine a lower and higher virulence organism, respectively.  
56  
57  
58  
59  
60

1  
2  
3 The infection groups are not mutually exclusive, for example, bloodstream infections due to  
4  
5 *Staphylococcus aureus* were also classified in the Gram positive organism group.  
6  
7

8 Community associated infections were excluded. The portal of entry of bloodstream infection  
9  
10 (e.g., urinary tract infection, pneumonia, intra-abdominal infection, central line) was not  
11  
12 available.  
13

14  
15 The study was approved by the ethics committees of Queensland Health and Queensland  
16  
17 University of Technology. The Research Ethics Governance Unit for Queensland Health  
18  
19 approved the data collection and linkage process, number: HREC/10/QPAH/180.  
20  
21

## 22 23 **Statistical methods**

24  
25 The basis of our statistical model is shown in Figure 1. A patient's admission over time is  
26  
27 modelled using the four states, with all patients eventually dying or being discharged, and  
28  
29 some patients being infected. Using this multi-state model we can examine our two key  
30  
31 questions:  
32  
33

- 34  
35 1. By how much did a hospital-acquired bloodstream infection increase the risk of death?
- 36  
37 2. By how much did a hospital-acquired bloodstream infection increase the length of stay?
- 38  
39

### 40 41 *Incidence density sampling*

42  
43 We created a smaller group of infected and non-infected patients from the complete data  
44  
45 using incidence density sampling.<sup>10</sup> The incidence density sampling approach is illustrated in  
46  
47 Figure 2. Patient E is the infected case, whose infection occurred four days after their  
48  
49 admission. Patient D is not a potential control, as they were discharged alive before day four.  
50  
51 The other three patients (A to C) are all eligible controls as they were infection free at the  
52  
53 time of the case's infection. This includes patient C, who acquired an infection on a later day.  
54  
55  
56  
57  
58  
59  
60

1  
2  
3 The days in hospital after the infection (for both cases and controls) were used to estimate the  
4  
5 extra length of stay (solid lines in Figure 2). We examined the extra number of days in both  
6  
7 standard and intensive care beds (thin and thick lines in Figure 2, respectively). For patients  
8  
9 with multiple infections, we only considered their first infection. This was done to simplify  
10  
11 the analysis (as multiple infections would require another state in Figure 1), and because  
12  
13 there were relatively few admissions with multiple infections.  
14  
15

16  
17 Matching infected patients to control patients when estimating the extra length of stay due to  
18  
19 infection usually gives poor estimates because of the time-dependent bias.<sup>5</sup> This bias occurs  
20  
21 because the time before infection is used when estimating the extra length of stay (dashed  
22  
23 horizontal lines in Figure 2). However, unlike traditional matching studies, we used incidence  
24  
25 density sampling, which also matches on the timing of infection because potential controls  
26  
27 must have been infection free at the time of the case's infection.<sup>10</sup>  
28  
29

30  
31 To make comparable groups of patients in terms of morbidity we matched infected cases to  
32  
33 controls who: had the same first letter in the principal diagnosis code (using ICD-10 coding),  
34  
35 were of a similar age (within 10 years), were at the same hospital, and were infection free at  
36  
37 the time of the case's infection. We randomly selected four controls for each infected patient.  
38  
39

#### 40 41 *Statistical power*

42  
43 The study had a 90% power to detect an increased hazard ratio of 1.40 (40%) for infected  
44  
45 versus uninfected patients using the smallest number of infections of 189 for MRSA, and an  
46  
47 increased hazard ratios of 1.18 (18%) for the second smallest number of infections of 744.  
48  
49

50  
51 These calculations assumed a two-sided 5% significance level.

52  
53 We only examined the risk of in-hospital death, as we had no information on patients after  
54  
55 discharge.  
56  
57

### *Extra length of stay*

We estimated the extra length of stay due to infection using the following steps. We calculated the number of days from infection to discharge for cases, and the number of days from the case's infection to discharge for its four matched controls. We then subtracted the case's length of stay from the average length of stay for its matched controls, with separate estimates for stays in standard and ICU beds. We then averaged these individual extra lengths of stay over all cases. These averages were stratified to create separate estimates for patients discharged alive and dead.

There are no parametric equations for calculating confidence intervals for the extra length of stay, hence we used a bootstrap method to generate a 95% confidence interval.<sup>11</sup> We randomly selected sets of cases and matched controls with replacement, creating a random sample with the same sample size as the original data. We repeated this random selection 1,000 times.

All analyses were conducted in R version 2.15.0 using the "survival" library.

## **RESULTS**

### *Hazard ratios*

The hazard ratios (HRs) for the eight bloodstream infections are in Table 2. All eight infections increased the risk of death, with the largest risk for MRSA (HR = 4.6) and the smallest for gram negative BSI (HR = 2.1). The increases were statistically significant for all eight infections, as the lower limits of the 95% confidence intervals were all above 1. The greatest number of infections was 2,141 for gram positive BSI, and the smallest number was 189 for MRSA.

### *Extra length of stay*



1  
2  
3 The extra lengths of stay for the eight bloodstream infections are in Table 3. For patients that  
4  
5 died, there was no extra length of stay in a standard bed (as all the 95% confidence intervals  
6  
7 include zero). For patients discharged alive, infection was associated with an extra length of  
8  
9 stay in a standard bed for every type of bloodstream infection except the gram negative BSIs.  
10  
11 The longest extra length of stay to discharge in a standard bed was 12.8 days for MRSA  
12  
13 (95% CI: 6.2, 26.1 days). The 95% confidence intervals are noticeably wider for infections  
14  
15 with smaller numbers.  
16  
17

18  
19 Most of the bloodstream infection types were associated with an extra length of stay in ICU  
20  
21 for both patients that lived and died (Table 3). The extra lengths of stay were generally longer  
22  
23 for those patients that died. The longest extra length of stay to death in an ICU bed was 6.0  
24  
25 days for a BSI with CNS (95% CI: 3.3, 10.0 days).  
26  
27

## 28 29 CONCLUSION

30  
31  
32 This is one of the largest studies to estimate the increased length of stay and risk of death due  
33  
34 to hospital-acquired infection.<sup>4</sup> All eight bloodstream infection types studied increased the  
35  
36 risk of death and most led to extra days in intensive care. Five of the bloodstream infections  
37  
38 also prolonged stay in a standard hospital bed by an average of between 9.8 and 12.8 days.  
39  
40 The eight hospital-acquired infections studied therefore significantly increased mortality and  
41  
42 morbidity.  
43  
44

45  
46 Gram negative infections had generally shorter extra lengths of stay and lower risks of death  
47  
48 compared with the other infection types. The three most common organisms ~~of associated~~  
49  
50 with gram negative infection were *E. Coli*, *Pseudomonas aeruginosa* and *Klebsiella*  
51  
52 *pneumoniae*. There were no clear differences between patients with a gram positive and gram  
53  
54 negative infection in terms of their age or primary diagnosis (data not shown). BSI with CNS  
55  
56  
57  
58  
59  
60

1  
2  
3 had a higher death risk (HR=2.9) than Gram-negative BSIs (HR=2.1), which could reflect the  
4  
5 higher risk of organ failure.<sup>12</sup>  
6  
7

8 The average extra lengths of stay after infection were shorter for ICU bed days compared  
9  
10 with ward bed days for all infections, ~~which. This~~ is expected as the average extra length of  
11  
12 stay is proportional to the average total length of stay.<sup>2</sup> ~~and lengths of stay were generally~~  
13  
14 ~~longer in ward beds compared with ICU beds.~~  
15  
16

17  
18 MRSA was associated with the largest increased risk of death (HR = 4.6) and the largest  
19  
20 increase in length of stay for a standard bed (12.8 days for those discharged alive). BSI with  
21  
22 CNS had the largest increased length of stay in an ICU bed of 6.0 days for patients who died  
23  
24 and 1.4 days for patients discharged alive. These estimates of hazard ratio and length of stay  
25  
26 are similar to those from related studies that account for the time-dependent bias. A study in  
27  
28 European hospitals found hazard ratios of 3.5 due to MRSA BSI and 3.1 for MSSA BSI, with  
29  
30 an extra length of stay of 9.2 days for MRSA BSI and 8.6 days for MSSA BSI.<sup>13</sup> Results  
31  
32 from ICUs in 10 European countries gave estimated hazard ratios for BSIs ranging from 2.1  
33  
34 to 4.4 depending on the organism, and extra lengths of stay in ICU ranging from -0.1 to 3.7  
35  
36 days.<sup>1</sup> ICUs in France had an estimated odds ratio for death of 3.2 due to a BSI infection,  
37  
38 with a lower odds ratio of 2.7 for those who received appropriate treatment.<sup>14</sup> ~~ICUs in Latin~~  
39  
40 ~~America had average excess length of stay due to a central line association BSI between -1.2~~  
41  
42 ~~and 4.7 days.~~<sup>15</sup> ~~A study of ICUs in Germany found an extra length of stay of 2.7 days for~~  
43  
44 ~~BSIs.~~<sup>3</sup>  
45  
46  
47  
48

### 49 *Study limitations*

50  
51  
52 We used a large routinely collected data set of all hospital admissions. Larger data sets give  
53  
54 more statistical power, but are often not as detailed or error-free as prospectively collected  
55  
56  
57  
58  
59  
60

1  
2  
3 data. The hospital admission data used here are subject to data checking at the time of entry,  
4  
5 and we subjected the data to further logical checks and found no errors.  
6  
7

8 We matched controls to cases using the first letter of ICD-10 code so that controls and cases  
9  
10 were broadly similar in terms of morbidity, ~~and to prevent very different patients being~~  
11 ~~compared (e.g., psychiatric patients with renal patients). We did not adjust for morbidity~~  
12 ~~beyond age and ICD-10 code because no further morbidity data were available.~~ It is possible  
13  
14 that even after the matching, the infected cases were sicker than the controls (prior to the  
15  
16 infection) and that this somewhat explains the cases' extra length of stay and increased risk of  
17  
18 death. However, adjusting for the timing of infection (which we did) is far more important  
19  
20 than adjusting for baseline morbidity when estimating the extra length of stay due to  
21  
22 infection.<sup>15</sup>  
23  
24  
25  
26  
27  
28

29 Despite using hospital-wide surveillance, some infections may have been missed. The  
30  
31 surveillance relies on clinical testing, so an infected but untested patient would be missed.  
32  
33 However, collection of blood cultures is standard for patients with a fever during  
34  
35 hospitalisation.  
36  
37

38 Our results should be generalisable to other settings, but it is possible that differences will  
39  
40 occur depending on how infections are managed. For example, some hospitals use hospital in  
41  
42 the home schemes, where infected patients can be cared for at home rather than in the  
43  
44 hospital.<sup>16</sup> Caring for infected patients in their own home would reduce the extra length of  
45  
46 hospital stay due to infection. Unfortunately we did not have data on the use of hospital in the  
47  
48 home, and so could not estimate the entire patient journey. If we had this data it could have  
49  
50 been added as another state to the multi-state model in Figure 1.  
51  
52  
53

54  
55 We had no data on why the extra length of stay occurred. For example, the extra lengths of  
56  
57 stay may be directly due to the increased morbidity of infection or they could be due to a  
58  
59  
60

1  
2  
3 change in patient management, such as the use of defined durations of intravenous antibiotics  
4 (such as for *Staphylococcus aureus* bloodstream infection). It is also possible that the total  
5 extra length of stay after bloodstream infection is not solely due to the infection. For  
6  
7  
8  
9  
10 example, a patient's stay is initially extended because of a bloodstream infection, then during  
11  
12 this extra stay an unrelated adverse event happens, for example an adverse drug reaction that  
13  
14 keeps them in hospital for longer.<sup>17</sup> To further investigate extra length of stay due to  
15  
16 infection, we recommend a detailed individual study that follows patients from the time of  
17  
18 their infection to discharge, and details the decisions made and resources used.<sup>18</sup> In some  
19  
20 hospitals this is already collected using a post-infection review.  
21  
22

### 23 ***Study strengths***

24  
25  
26 This is one of the first studies to accurately estimate the extra length of stay due to  
27  
28 bloodstream infection in a standard hospital bed, as most previous good estimates only  
29  
30 examined ICU beds. This is important because days in hospital are costly so extra length of  
31  
32 stay is key to determining the economic costs of infection,<sup>19</sup> as well as being an important  
33  
34 measure of morbidity. ICU beds have a far greater economic cost than standard beds, so it is  
35  
36 vital to get separate estimates for ward and ICU beds.<sup>20</sup>  
37  
38  
39

40  
41 Our results can be used to inform parameters for studies of the cost-effectiveness of  
42  
43 interventions that reduce risks of hospital-acquired infection. This is the most useful  
44  
45 application of estimates, as only describing the size of the cost does not help decision-makers,  
46  
47 although it might get the attention of politicians and the media in the short-term. Also,  
48  
49 erroneous estimates of these parameters might have misled decision making in the past.<sup>5</sup> The  
50  
51 application of a multi-state modelling approach (Figure 1), which appropriately classifies  
52  
53 patient risks over time should become the gold standard method for these studies.<sup>3</sup>  
54  
55  
56  
57  
58  
59  
60

1  
2  
3 A key parameter in cost-effectiveness models is the extra number of deaths, as the years of  
4  
5 life lost have a potentially large economic cost. We found that all eight types of bloodstream  
6  
7 infections increased the risk of death. Avoiding infections is therefore likely to both save  
8  
9 lives and free up valuable bed days.  
10

11  
12  
13 **What is already known on this subject?**

14  
15 Hospital-acquired bloodstream infections are thought to increase the risk of death and lead to  
16  
17 longer stays in hospital. The only previous estimates of the risks to date have been: biased by  
18  
19 poor statistical methods, or only applicable to patients in intensive care units.  
20

21  
22 **What this study adds?**

23  
24 This is the first study to accurately estimate the risks of death and extra length of stay in a  
25  
26 hospital population. These estimates will be vital for cost-effectiveness analyses of  
27  
28 interventions in hospital that aim to reduce infections (e.g., alternative cleaning regimes).  
29  
30

31  
32 **Acknowledgements:** Thanks to all the hospital Infection Control Practitioners for  
33  
34 undertaking the HAI surveillance used for this analysis. Thanks also to the staff at  
35  
36 Queensland Health in the Health Statistics Centre and Centre for Healthcare Related Infection  
37  
38 Surveillance and Prevention, for providing and merging the hospital and infection data.  
39

40  
41 Computational resources and services used in this work were provided by the High  
42  
43 Performance Computer and Research Support Unit, Queensland University of Technology,  
44  
45 Brisbane, Australia.  
46  
47

48  
49 **Competing interests:** None.  
50

51  
52 **Funding:** This work was supported by a National Health and Medical Research Council  
53  
54 partnership grant (number 553081) with financial and in kind support from: Australian  
55  
56 Commission on Safety and Quality in Health Care, Hand Hygiene Australia, and  
57  
58  
59  
60

1  
2  
3  
4  
5  
6  
7  
8  
9  
10  
11  
12  
13  
14  
15  
16  
17  
18  
19  
20  
21  
22  
23  
24  
25  
26  
27  
28  
29  
30  
31  
32  
33  
34  
35  
36  
37  
38  
39  
40  
41  
42  
43  
44  
45  
46  
47  
48  
49  
50  
51  
52  
53  
54  
55  
56  
57  
58  
59  
60

jurisdictional health departments. The Centre for Healthcare Related Infection Surveillance and Prevention, Communicable Diseases Branch, Queensland Health, supports the salaries of N.G. and D.L.P. K.P.'s salary comes from the National Health and Medical Research Council partnership grant.

For peer review only

## References

1. Lambert, M-L, Suetens, C, Savey, A, *et al.* Clinical outcomes of health-care-associated infections and antimicrobial resistance in patients admitted to European intensive-care units: a cohort study. *Lancet Infect Dis* 2011;**11**:30-38.
2. Barnett, AG, Beyersmann, J, Allignol, A, Rosenthal, VD, Graves, N, Wolkewitz, M. The Time-Dependent Bias and its Effect on Extra Length of Stay due to Nosocomial Infection. *Value in Health* 2011;**14**:381-386.
3. Beyersmann, J, Gastmeier, P, Grundmann, H, *et al.* Use of multistate models to assess prolongation of intensive care unit stay due to nosocomial infection. *Infect Control Hosp Epidemiol* 2006;**27**:493-499.
4. Crnich, C. Estimating excess length of stay due to central line-associated bloodstream infection: separating the wheat from the chaff. *Infect Control Hosp Epidemiol* 2010;**31**:1115-1117.
5. Graves, N, Harbarth, S, Beyersmann, J, Barnett, A, Halton, K, Cooper, B. Estimating the Cost of Health Care-Associated Infections: Mind Your p's and q's. *Clinical Infectious Diseases* 2010;**50**:1017-1021.
6. Halton, KA, Cook, D, Paterson, DL, Safdar, N, Graves, N. Cost-Effectiveness of a Central Venous Catheter Care Bundle. *PLoS ONE* 2010;**5**:e12815.
7. Graves, N, Halton, K, Doidge, S, Clements, A, Lairson, D, Whitby, M. Who bears the cost of healthcare-acquired surgical site infection? *Journal of Hospital Infection* 2008;**69**:274-282.
8. Morton, AP, Clements, AC, Doidge, SR, Stackelroth, J, Curtis, M, Whitby, M. Surveillance of Healthcare-Acquired Infections in Queensland, Australia: Data and Lessons From the First 5 Years. *Infect Control Hosp Epidemiol* 2008;**29**:695-701.

- 1  
2  
3 9. Centre for Healthcare Related Infection Surveillance and Prevention, *Surveillance*  
4  
5 *Manual*. 2009, Queensland Health.
- 6  
7 10. Wolkewitz, M, Beyersmann, J, Gastmeier, P, Schumacher, M. Efficient Risk Set  
8  
9 Sampling when a Time-dependent Exposure Is Present. *Methods Inf Med* 2009;**48**:438–  
10  
11 443.
- 12  
13 11. Davison, AC, Hinkley, DV, *Bootstrap Methods and Their Application*: Cambridge  
14  
15 University Press; 1997.
- 16  
17 12. Savithri, MB, Iyer, V, Jones, M, *et al*. Epidemiology and significance of coagulase-  
18  
19 negative staphylococci isolated in blood cultures from critically ill adult patients. *Crit*  
20  
21 *Care Resusc* 2011;**13**:103-107.
- 22  
23 13. de Kraker, MEA, Wolkewitz, M, Davey, PG, Grundmann, H. Clinical Impact of  
24  
25 Antimicrobial Resistance in European Hospitals: Excess Mortality and Length of Hospital  
26  
27 Stay Related to Methicillin-Resistant Staphylococcus aureus Bloodstream Infections.  
28  
29 *Antimicrob Agents Chemother* 2011;**55**:1598-1605.
- 30  
31 14. Garrouste-Orgeas, M, Timsit, JF, Tafflet, M, *et al*. Excess Risk of Death from  
32  
33 Intensive Care Unit—Acquired Nosocomial Bloodstream Infections: A Reappraisal.  
34  
35 *Clinical Infectious Diseases* 2006;**42**:1118-1126.
- 36  
37 15. Beyersmann, J, Kneib, T, Schumacher, M, Gastmeier, P. Nosocomial Infection,  
38  
39 Length of Stay, and Time-Dependent Bias. *Infection Control and Hospital Epidemiology*  
40  
41 2009;**30**:273-276.
- 42  
43 16. Howden, BP, Grayson, ML. Hospital-in-the-home treatment of infectious diseases.  
44  
45 *Med J Aust* 2002;**176** 440-445.
- 46  
47 17. Hauck, K, Zhao, X. How Dangerous is a Day in Hospital?: A Model of Adverse  
48  
49 Events and Length of Stay for Medical Inpatients. *Med Care* 2011;**49**:1068-1075.  
50  
51  
52  
53  
54  
55  
56  
57  
58  
59  
60



- 1  
2  
3 18. Collignon, PJ, Wilkinson, IJ, Gilbert, GL, Grayson, ML, Whitby, RM. Health care-  
4 associated Staphylococcus aureus bloodstream infections: a clinical quality indicator for  
5 all hospitals. *Med J Aust* 2006;**184**:404-406.  
6  
7  
8  
9  
10 19. Grayson, ML, Russo, PL, Cruickshank, M, *et al*. Outcomes from the first 2 years of  
11 the Australian National Hand Hygiene Initiative. *Med J Aust* . 2011;**195**:615-619.  
12  
13  
14 20. Rechner, I, Lipman, J. The costs of caring for patients in a tertiary referral Australian  
15 Intensive Care Unit. *Anaesth Intensive Care* 2005;**33**:477-482.  
16  
17  
18  
19  
20  
21  
22  
23  
24  
25  
26  
27  
28  
29  
30  
31  
32  
33  
34  
35  
36  
37  
38  
39  
40  
41  
42  
43  
44  
45  
46  
47  
48  
49  
50  
51  
52  
53  
54  
55  
56  
57  
58  
59  
60

1  
2  
3 **Tables**  
4

5 Table 1: Basic characteristics of the nine Queensland hospitals combined, patients with  
6 admission or discharge dates between 1 January 2005 and 31 December 2010. Results for all  
7 admissions and admissions by infection status.  
8  
9  
10

| <b>Admissions</b>                 | <b>Numbers</b> | <b>Patient age,<br/>median (IQR)</b> | <b>LoS in days,<br/>median (IQR)</b> | <b>In-hospital<br/>deaths (%)</b> |
|-----------------------------------|----------------|--------------------------------------|--------------------------------------|-----------------------------------|
| <b>All</b>                        | 2,725,515      | 53 (32, 69)                          | 1 (1, 4)                             | 1.1                               |
| <b>Those with an infection</b>    | 19,206         | 61 (44, 74)                          | 15 (6, 31)                           | 7.1                               |
| <b>Those without an infection</b> | 2,706,309      | 53 (32, 69)                          | 1 (1, 4)                             | 1.0                               |

11  
12  
13  
14  
15  
16  
17  
18  
19  
20  
21 IQR = inter-quartile range, LoS = length of stay  
22  
23  
24  
25  
26  
27  
28  
29  
30  
31  
32  
33  
34  
35  
36  
37  
38  
39  
40  
41  
42  
43  
44  
45  
46  
47  
48  
49  
50  
51  
52  
53  
54  
55  
56  
57  
58  
59  
60

Table 2: Risks of in-hospital death due to a hospital-acquired bloodstream infection. Based on nine hospitals with admissions between 1 January 2005 and 31 December 2010.

| Bloodstream infection        | Number of infections | Deaths in infections, n (%) | Controls | Deaths in controls, n (%) | Hazard ratio (95% CI) |
|------------------------------|----------------------|-----------------------------|----------|---------------------------|-----------------------|
| <b>BSI and gram positive</b> | 2,141                | 338 (15.8%)                 | 8,512    | 526 (6.2%)                | 3.0 (2.6, 3.5)        |
| <b>BSI with SAB</b>          |                      |                             |          |                           |                       |
| All                          | 744                  | 124 (16.7%)                 | 2,950    | 175 (5.9%)                | 3.5 (2.7, 4.6)        |
| MRSA                         | 189                  | 38 (20.1%)                  | 740      | 45 (6.1%)                 | 4.6 (2.7, 7.6)        |
| MSSA                         | 555                  | 86 (15.5%)                  | 2,218    | 121 (5.5%)                | 3.4 (2.5, 4.7)        |
| <b>BSI with CNS</b>          | 918                  | 139 (15.1%)                 | 3,640    | 219 (6.0%)                | 2.9 (2.3, 3.7)        |
| <b>BSI and gram negative</b> |                      |                             |          |                           |                       |
| All                          | 2,044                | 285 (13.9%)                 | 8,089    | 609 (7.5%)                | 2.1 (1.8, 2.4)        |
| <i>E. coli</i>               | 465                  | 57 (12.3%)                  | 1,838    | 130 (7.1%)                | 2.0 (1.4, 2.8)        |
| <i>Pseudomonas</i>           | 449                  | 74 (16.5%)                  | 1,771    | 163 (9.2%)                | 2.2 (1.6, 3.0)        |

BSI = bloodstream infection, CI = confidence interval, CNS = coagulase-negative

staphylococci, MRSA = Methicillin-resistant *Staphylococcus aureus*, SAB = *Staphylococcus aureus* bacteremia.

Table 3: Extra length of stay (in days) in a standard bed and ICU bed due to a hospital-acquired bloodstream infection. Cells show the mean extra length of stay (in days) with 95% confidence intervals in parentheses. Based on nine hospitals with admissions between 1 January 2005 and 31 December 2010. Separate estimates were made for admissions that ended in death and discharge. The total length of stay is the standard bed time plus the ICU bed time (see Figure 2).

| Bloodstream Infection        | Standard bed       |                  | ICU bed         |                 |
|------------------------------|--------------------|------------------|-----------------|-----------------|
|                              | Died               | Discharged       | Died            | Discharged      |
| <b>BSI and gram positive</b> |                    |                  |                 |                 |
| <b>BSI with SAB</b>          |                    |                  |                 |                 |
| <b>All</b>                   | -1.5 (-6.8, 6.1)   | 12.1 (6.7, 15.3) | 1.4 (0.5, 3.0)  | 0.9 (0.1, 2.9)  |
| <b>MRSA</b>                  | -1.6 (-12.6, 12.6) | 12.8 (6.2, 26.1) | 3.1 (0.5, 7.2)  | 3.1 (0.4, 13.2) |
| <b>MSSA</b>                  | 2.7 (-2.6, 9.7)    | 11.0 (6.4, 14.9) | 0.7 (-0.3, 2.0) | 0.4 (0.0, 0.8)  |
| <b>BSI with CNS</b>          | 3.5 (-4.0, 13.4)   | 9.8 (3.6, 14.6)  | 6.0 (3.3, 10.0) | 1.4 (0.6, 2.5)  |
| <b>BSI and gram negative</b> |                    |                  |                 |                 |
| <b>All</b>                   | -3.9 (-8.7, -0.4)  | 2.7 (-4.1, 6.1)  | 3.0 (1.4, 4.5)  | 0.6 (0.3, 1.0)  |
| <b><i>E. coli</i></b>        | -3.3 (-9.3, 7.9)   | 1.1 (-13.2, 5.7) | 2.5 (0.4, 4.7)  | 0.5 (-0.1, 0.9) |
| <b><i>Pseudomonas</i></b>    | -5.4 (-11.6, 9.2)  | 5.6 (-6.4, 14.3) | 3.2 (0.8, 7.1)  | 0.5 (0.3, 1.2)  |

BSI = bloodstream infection, CI = confidence interval, CNS = coagulase-negative staphylococci, ICU = intensive care unit, MRSA = Methicillin-resistant *Staphylococcus aureus*, MSSA = Methicillin-sensitive *Staphylococcus aureus*, SAB = *Staphylococcus aureus* bacteremia.

### Figure legends

Figure 1: Four-state model to estimate the extra risk of death and extra length of stay due to a hospital-acquired bloodstream infection. The arrows represent hazards in a survival model.

The extra risk of death was estimated using the hazard ratio of the hazard of death for infected patients (arrow A) and the hazard for susceptible patients (arrow C). The extra length of stay for those discharged alive was calculated by comparing the time take to discharge for infected patients (arrow B) with the time take to discharge for susceptible patients (arrow D)

Figure 2: Illustration of incidence density sampling for an infected case (patient E) and matched controls (patients A to C). The vertical dotted line shows the timing of infection.

The dashed lines show the periods of hospital stay before infection. These times are discarded, as only times after infection are used to estimate the extra length of stay. The thicker solid lines show time spent in ICU. Adapted from Wolkewitz et al (2009).



1  
2  
3  
4  
5  
6  
7  
8  
9  
10  
11  
12  
13  
14  
15  
16  
17  
18  
19  
20  
21  
22  
23  
24  
25  
26  
27  
28  
29  
30  
31  
32  
33  
34  
35  
36  
37  
38  
39  
40  
41  
42  
43  
44  
45  
46  
47  
48  
49  
50  
51  
52  
53  
54  
55  
56  
57  
58  
59  
60

.....  
  
.....  
  
.....



.....  
  
.....  
  
.....

Illustration of incidence density sampling for an infected case (patient E) and matched controls (patients A to C). The vertical dotted line shows the timing of infection. The dashed lines show the periods of hospital stay before infection. These times are discarded, as only times after infection are used to estimate the extra length of stay. The thicker solid lines show time spent in ICU. Adapted from Wolkewitz et al (2009).  
279x361mm (300 x 300 DPI)

1  
2  
3  
4  
5  
6  
7  
8  
9  
10  
11  
12  
13  
14  
15  
16  
17  
18  
19  
20  
21  
22  
23  
24  
25  
26  
27  
28  
29  
30  
31  
32  
33  
34  
35  
36  
37  
38  
39  
40  
41  
42  
43  
44  
45  
46  
47  
48  
49  
50  
51  
52  
53  
54  
55  
56  
57  
58  
59  
60STROBE Statement—Checklist of items that should be included in reports of *case-control studies*

|                              | Item No | Recommendation                                                                                                                                                                                                                                                                                                                                                                                                |                                       |
|------------------------------|---------|---------------------------------------------------------------------------------------------------------------------------------------------------------------------------------------------------------------------------------------------------------------------------------------------------------------------------------------------------------------------------------------------------------------|---------------------------------------|
| <b>Title and abstract</b>    | 1       | (a) Indicate the study's design with a commonly used term in the title or the abstract<br>(b) Provide in the abstract an informative and balanced summary of what was done and what was found                                                                                                                                                                                                                 | Page 1<br>Page 2                      |
| <b>Introduction</b>          |         |                                                                                                                                                                                                                                                                                                                                                                                                               |                                       |
| Background/rationale         | 2       | Explain the scientific background and rationale for the investigation being reported                                                                                                                                                                                                                                                                                                                          | Page 4                                |
| Objectives                   | 3       | State specific objectives, including any prespecified hypotheses                                                                                                                                                                                                                                                                                                                                              | Page 6                                |
| <b>Methods</b>               |         |                                                                                                                                                                                                                                                                                                                                                                                                               |                                       |
| Study design                 | 4       | Present key elements of study design early in the paper                                                                                                                                                                                                                                                                                                                                                       | Page 6 & Fig 1                        |
| Setting                      | 5       | Describe the setting, locations, and relevant dates, including periods of recruitment, exposure, follow-up, and data collection                                                                                                                                                                                                                                                                               | Page 4                                |
| Participants                 | 6       | (a) Give the eligibility criteria, and the sources and methods of case ascertainment and control selection. Give the rationale for the choice of cases and controls<br>(b) For matched studies, give matching criteria and the number of controls per case                                                                                                                                                    | Page 7 & Fig 2<br>Page 7              |
| Variables                    | 7       | Clearly define all outcomes, exposures, predictors, potential confounders, and effect modifiers. Give diagnostic criteria, if applicable                                                                                                                                                                                                                                                                      | Page 4                                |
| Data sources/<br>measurement | 8*      | For each variable of interest, give sources of data and details of methods of assessment (measurement). Describe comparability of assessment methods if there is more than one group                                                                                                                                                                                                                          | Pages 4-5                             |
| Bias                         | 9       | Describe any efforts to address potential sources of bias                                                                                                                                                                                                                                                                                                                                                     |                                       |
| Study size                   | 10      | Explain how the study size was arrived at                                                                                                                                                                                                                                                                                                                                                                     | Page 7                                |
| Quantitative variables       | 11      | Explain how quantitative variables were handled in the analyses. If applicable, describe which groupings were chosen and why                                                                                                                                                                                                                                                                                  | Pages 6-8                             |
| Statistical methods          | 12      | (a) Describe all statistical methods, including those used to control for confounding<br>(b) Describe any methods used to examine subgroups and interactions<br>(c) Explain how missing data were addressed<br>(d) If applicable, explain how matching of cases and controls was addressed<br>(e) Describe any sensitivity analyses                                                                           | Pages 6-8<br>NA<br>NA<br>Page 7<br>NA |
| <b>Results</b>               |         |                                                                                                                                                                                                                                                                                                                                                                                                               |                                       |
| Participants                 | 13*     | (a) Report numbers of individuals at each stage of study—eg numbers potentially eligible, examined for eligibility, confirmed eligible, included in the study, completing follow-up, and analysed<br>(b) Give reasons for non-participation at each stage<br>(c) Consider use of a flow diagram                                                                                                               | Tables 1 & 2<br>NA<br>NA              |
| Descriptive data             | 14*     | (a) Give characteristics of study participants (eg demographic, clinical, social) and information on exposures and potential confounders<br>(b) Indicate number of participants with missing data for each variable of interest                                                                                                                                                                               | Table 1<br>NA                         |
| Outcome data                 | 15*     | Report numbers in each exposure category, or summary measures of exposure                                                                                                                                                                                                                                                                                                                                     | Table 1                               |
| Main results                 | 16      | (a) Give unadjusted estimates and, if applicable, confounder-adjusted estimates and their precision (eg, 95% confidence interval). Make clear which confounders were adjusted for and why they were included<br>(b) Report category boundaries when continuous variables were categorized<br>(c) If relevant, consider translating estimates of relative risk into absolute risk for a meaningful time period | Tables 2 & 3<br>NA                    |



1  
2  
3  
4  
5  
6  
7  
8  
9  
10  
11  
12  
13  
14  
15  
16  
17  
18  
19  
20  
21  
22  
23  
24  
25  
26  
27  
28  
29  
30  
31  
32  
33  
34  
35  
36  
37  
38  
39  
40  
41  
42  
43  
44  
45  
46  
47  
48  
49  
50  
51  
52  
53  
54  
55  
56  
57  
58  
59  
60

---

Other analyses 17 Report other analyses done—eg analyses of subgroups and interactions, and sensitivity analyses NA

---

### Discussion

|                          |    |                                                                                                                                                                            |             |
|--------------------------|----|----------------------------------------------------------------------------------------------------------------------------------------------------------------------------|-------------|
| Key results              | 18 | Summarise key results with reference to study objectives                                                                                                                   | Pages 9-12  |
| Limitations              | 19 | Discuss limitations of the study, taking into account sources of potential bias or imprecision. Discuss both direction and magnitude of any potential bias                 | Pages 10-12 |
| Interpretation           | 20 | Give a cautious overall interpretation of results considering objectives, limitations, multiplicity of analyses, results from similar studies, and other relevant evidence | Page 12     |
| Generalisability         | 21 | Discuss the generalisability (external validity) of the study results                                                                                                      | Page 11     |
| <b>Other information</b> |    |                                                                                                                                                                            |             |
| Funding                  | 22 | Give the source of funding and the role of the funders for the present study and, if applicable, for the original study on which the present article is based              | Page 13     |

\*Give information separately for cases and controls.

**Note:** An Explanation and Elaboration article discusses each checklist item and gives methodological background and published examples of transparent reporting. The STROBE checklist is best used in conjunction with this article (freely available on the Web sites of PLoS Medicine at <http://www.plosmedicine.org/>, Annals of Internal Medicine at <http://www.annals.org/>, and Epidemiology at <http://www.epidem.com/>). Information on the STROBE Initiative is available at <http://www.strobe-statement.org>.
